# Supplementary material for: Dynamic white matter microstructure in anorexia nervosa: associations with neurofilament light and leptin across early weight restoration
Source: Research Square preprint supplement (doi:10.21203/rs.3.rs-9434305/v1), 2026-06-11
Supplement: Supplementary file 1 [file d6d9a723c9dd12e7e83190fc.docx]

***Supplementary Information***

**Dynamic white matter microstructure in anorexia nervosa: associations with neurofilament light and leptin across early weight restoration**

Svea Königsmann, M.Sc.1, Fabio Bernardoni, Ph.D.1, E. Caitlin Lloyd, Ph.D.2,3, Clara M. Breier, M.Sc.1, Marlene Riedl, Cand.Med.1, Fernando Fernández-Aranda, Ph.D.4,5,6, Philip Gorwood, M.D., Ph.D.7,8, Annekatrin Locke, M.D.9,10, Roy Bockholt, M.D.11, Veit Rössner, M.D.9, Daniel Geisler, M.Sc.1, Stefan Ehrlich, M.D., Ph.D.1,10

1 Translational Developmental Neuroscience Section, Division of Psychological and Social Medicine and Developmental Neuroscience, Faculty of Medicine, Technische Universität Dresden, Dresden, Germany

2 Department of Psychiatry, Columbia University Irving Medical Center, New York, US

3 New York State Psychiatric Institute, New York, US

4 Clinical Psychology Department, University Hospital of Bellvitge and IDIBELL, Barcelona, Spain

5 CIBER Physiopathology of Obesity and Nutrition (CIBERobn), Instituto de Salud Carlos III, Barcelona, Spain

6 Department of Clinical Sciences, School of Medicine and Health Sciences, University of Barcelona, Barcelona, Spain

7 Université Paris Cité, INSERM, UMR1266, F-75013 Paris

8 GHU Paris Psychiatrie et Neurosciences, Hôpital Sainte-Anne (CMME), 100 rue de la santé, F-75014 Paris

9 Department of Child and Adolescent Psychiatry and Psychotherapy, Faculty of Medicine, University Hospital Carl Gustav Carus, Technische Universität Dresden, Dresden, Germany

10 Eating Disorder Research and Treatment Center, Department of Child and Adolescent Psychiatry and Psychotherapy, Faculty of Medicine, Technische Universität Dresden, Dresden, Germany

11 Department of Psychotherapy and Psychosomatic Medicine, Faculty of Medicine, University Hospital Carl Gustav Carus, TU Dresden, Dresden, Germany

**Supplementary Methods.**

**Supplementary Results.**

**Supplementary Tables.**

**References.**

# **Supplementary Methods**

## *1.1 Quality control procedures*

T1-weighted (T1w) structural scans underwent FreeSurfer preprocessing, which include skull stripping and bias field correction. After automatic reconstruction of the cerebral cortex and subcortical regions with FreeSurfer (v7.1.1), standardized quality control (QC) was performed by trained raters following standardized procedures established within the ENIGMA consortium (http://enigma.ini.usc.edu/). Initially, the FreeSurfer QA Tools were used to verify that all steps in the FreeSurfer recon-all stream were executed and in the correct order and to create detailed snapshots of various volumes and surfaces. If artifacts that exert a significant influence on parcellation (mainly dura inclusions in the pial surface) were detected while inspecting the snapshots, the corresponding scan was excluded from the analysis. Subsequently, all thickness/surface data for the cortical regions of the Desikan-Killiany atlas 1 and subcortical regions were extracted. Scans for which at least three of these measures deviated by more than 2.698 standard deviations (SD) relative to the group mean were inspected more closely by a trained rater using Freeview. If significant artifacts were detected, the scan was excluded.

For detection of artifacts in the diffusion-weighted imaging (DWI) data, a visual QC procedure for FA images was implemented, conducted both prior to and following nonlinear registration to the ENIGMA template, in accordance with ENIGMA consortium guidelines. To ensure the suitability of fractional anisotropy (FA) images for tract-based spatial statistics (TBSS), instructed raters visually inspected the alignment of principal diffusion directions with major white matter (WM) tracts following the ENIGMA vector QC protocol (https://github.com/ENIGMA-git/ENIGMA-DTI-TBSS-protocol/tree/master/vector_QC). For each participant, axial, coronal, and sagittal images of unregistered FA maps were generated with overlaid first eigenvectors, restricted to voxels with FA>0.2. Additionally, raters manually assessed the quality of nonlinear registration by inspecting the alignment of individual warped FA images to the ENIGMA template and the standardized WM skeleton using FSLeyes. Images exhibiting substantial misalignment or poor anatomical correspondence with the template were excluded. However, all images passed these DWI quality checks.

## *1.2 Participants*

MRI data from a total of 105 individual female participants with AN and 151 female HC were collected. HC were oversampled to enable case-control age-matching in other studies focused on a predominately adult cohort of long-term weight-recovered individuals with a history of AN. After careful QC of the structural and DWI data, 101 scans of participants with AN at timepoint one (AN-TP1) and 74 scans at timepoint two (AN-TP2) were included in the final sample. Regarding the scans of HC, four additional data sets were excluded due to low data quality, resulting in 147 HC.

Within the HC group, 145 individuals identified as European and two as Asian. Within the AN group, all participants identified as European.

Please note that the current sample includes all participants from the previous TBSS study from our group 2, supplemented by an additional 41 AN-TP1, 30 AN-TP2, and 87 HC participants. Also, other study samples from our group overlap substantially with the current sample 3–7. However, all research questions (and data processing) of the current study are novel and unique.

## *1.3 Intelligence quotient*

IQ was estimated using full or short versions of age-appropriate German versions of the Wechsler Intelligence Scales for adults or children: HAWIK-IV in n=109 8; WIE-III in n=121 9; WAIS-IV in n=4 10; other in n=4. Short versions were used in 167 participants. IQ was only measured once in participants with AN after weight gain. In ten cases, IQ was missing. Missing measures were not imputed.

## *1.4 Blood sampling and analysis*

Venous blood samples were collected into vacutainer tubes between 7 and 9 a.m. after an overnight fast. To yield blood serum, blood samples were left to clot for 30 min at 6-8 °C and then centrifuged (800 x g for 15 min) in a pre-cooled (5 °C) centrifuge. The samples were then aliquoted into pre-cooled Eppendorf Tubes® and stored at -80 °C.

Determination of neurofilament light (NF‑L) levels was carried out using the digital SimoaTM Human Neurology 4-Plex A assay in combination with the SimoaTM HD-1 Analyzer or the digital Simoa® NF-light™ Advantage Kit in combination with the SimoaTM HD-X Analyzer (both Quanterix, Lexington, MA, USA) following the manufacturer’s instructions. The SimoaTM technology reaches significantly lower limits of detection (LOD) compared to conventional assays 11,12. LOD for NF-L was 0.104 pg/ml using the Human Neurology 4-Plex A assay and 0.038pg/ml using the NF-lightTM Advantage Ki 13,14. Serum NF‑L samples were measured in different batches and since the coefficient of variation (CV) in the first batches measured in duplicates (n=175) was always very good 5,15,16, the later samples were measured in singlicates (n=101).

Free serum brain-derived neurotrophic factors (BDNF) was quantified using commercially available enzyme-linked immunosorbent assay (ELISA) kits, according to the manufacturer’s instructions (R&D Systems, Minneapolis, MN, USA), in three batches. Since the CV in the first batch measured in duplicate (n=92) was always very good 17,18, the second and third batch were measured in singlicates (n=159). If serum samples were measured in duplicates, the mean of the two measurements was used in statistical analyses.

For blood plasma processing, aprotinin was added during blood sampling (270KIU/ml final concentration). Plasma samples were centrifuged immediately (2500 x g for 15 min) in a pre-cooled (5 °C) centrifuge. Thereafter they were aliquoted into pre-cooled Eppendorf Tubes® and stored at -80 °C. Plasma leptin was measured in singlicates using commercially available ELISA kits (BioVendor, Brno, Czech Republic). Left-censored leptin concentrations below the LOD of the applied leptin assay (LOD=0.20 ng/mL; n=20 AN-TP1, 0 AN-TP2, and 0 HC) were imputed using a quantile regression multiple imputation approach for left-censored missing data (QRILC). QRILC imputes values by randomly sampling from a truncated distribution whose parameters are estimated via quantile regression based on the observed leptin concentrations within the detection range. For this procedure, leptin values were log10-transformed, and no additional covariates were included in the imputation model. QRILC was conducted in R using the package “imputeLCMD” 19. A Gibbs sampler based approach 20 with n=100 iterative draws per value from the specified truncated distribution was then used to update the initialized values from QRILC and to ensure that the imputed leptin values were positive (on the original scale, i.e. >0) and below LOD.

## *1.5 Image acquisition*

As in our previous studies 3,21, high-resolution three-dimensional T1w structural scans were acquired on a 3T scanner (Magnetom Trio, Siemens, Erlangen, Germany) using a rapid acquisition gradient echo (MP‑RAGE) sequence with the following parameters: 176 sagittal slices (1 mm thickness, no gap), TR=1 900 ms; TE=2.26 ms; flip angle=9°; voxel size=1.0×1.0×1.0 mm3, FoV=256×224 mm2, bandwidth of 200 Hz/pixel).

## *1.6 Processing of DWI*

To preprocess the longitudinal dataset, QSIPrep (v0.19.0; https://qsiprep.readthedocs.io/) 22 was run with session-aware Brain Imaging Data Structure (BIDS) filtering to ensure that, for each participant and each session, the corresponding session-specific T1w image was selected as the anatomical reference for that timepoint. This yielded session-specific anatomical spaces that were used for registration. Following preprocessing of DWI data, diffusion tensors and corresponding tensor metrics were estimated using FSL (v6.0.7.8)’s DTIFIT. These computations were performed either on the mean b0 mask immediately after extraction or after applying free-water elimination. Consequently, tensor metrics, including FA, were derived for both standard and free-water-corrected images. More specifically, voxel-wise FA maps of the standard dataset were calculated by fitting a single diffusion tensor to each voxel using a conventional single-compartment model. In contrast, tissue-specific FA maps were obtained using the Freewater estimatoR using iNtErpolated initialization (FERNET; https://github.com/DiCIPHR-Lab/Fernet/) 23 method, which estimates the tissue fraction in each voxel by separating tissue diffusion from free water. Diffusion tensors were fitted exclusively to the tissue compartment, generating free-water-corrected FA maps.

Both uncorrected and free-water-corrected FA maps were further analyzed using TBSS 24 via the generalized TBSS pipeline (v0.1.6) developed by Billah 25. Within the pipeline, Advanced Normalization Tools (ANTS) 26 were used to register and warp FA maps into the ENIGMA-provided template space (MNI). Individual FA values were projected onto a standardized WM skeleton derived from the ENIGMA template to enhance alignment of WM voxels across participants. For region of interest (ROI)-based analysis, the individual skeletons were overlaid on a binary label map derived from the John Hopkins University atlas. For all 48 labeled regions, the pipeline extracted the mean FA values as well as the number of contributing voxels, which were saved for subsequent statistical analysis. All processing steps were implemented within the Nipype framework 27.

## *1.7 Statistical analyses*

NF‑L, BDNF, and leptin concentration values were logarithmically transformed (log10-transformation) to reduce deviations from normality. As recommended by previous publications 17,18, BDNF values were residualized to account for batch and storage time effects prior to the main analyses. Specifically, a linear model was fitted (formula: ). The resulting residual BDNF values produced by this model, after subtracting both batch and storage time effects, were used in analyses henceforth. Extreme outliers (>3 SD from the mean of the respective diagnostic group and timepoint after logarithmization and, for BDNF values only, residualization) were excluded prior to analysis resulting in the exclusion of four NF‑L concentration values (n=2 AN-TP1 and 2 AN-TP2), two BDNF concentration values (n=1 AN‑TP1 and 1 AN-TP2), and three leptin concentration values (n=3 AN-TP1). This resulted in longitudinal samples of n=49 for NF-L, n=46 for BDNF, and n=52 for leptin.

For all 48 ROIs, mean FA was modeled across groups (contrasts of interest: AN TP1–HC, AN-TP2–AN-TP1, and AN-TP2–HC) using a random-intercept linear mixed-effects (LME) model which assumes that the longitudinal differences in mean FA are a linear function of ΔBMI-SDS across short-term weight restoration (BMI-SDSTP(x) – BMI-SDSTP2, which is 0 if TP(x)=TP2). Age was grand mean-centered and modeled using orthogonal linear and quadratic terms. The intercept represents the estimated mean FA in HC at mean age and ΔBMI-SDS=0. The delta (Δ) term captures the group difference between AN-TP2–HC. Coefficients A, B, and BB represent fixed effects associated with short-term weight change as well as linear and quadric age effects, respectively. Age2⊥ indicates the orthogonal projection of Age2 onto Age.

Regarding follow-up LME models, the unstandardized coefficient (β), standard error (SE), *t*-value, 95% confidence interval (CI), unadjusted *p*-value, FDR-*q* (FDR-adjustment across all ROIs), and Cohen’s *d* effect size were calculated (Supplementary Table 5–7). Cohen’s *d* effect sizes were computed with 0.2, 0.5, and 0.8 representing small, moderate, and large effects, respectively 28.

Regression-based mediation models 29 were conducted on AN-TP2–AN-TP1 change scores in (A) age-adjusted NF-L concentrations, and (B) in age-adjusted FA. Prior to mediation, age effects were removed by residualizing (A) NF-L levels, and (B) FA with respect to age using a second-degree polynomial for each mediation model structure separately. Baseline NF-L concentrations and baseline FA were implicitly controlled for by modeling the change in NF-L levels and FA between TP1 and TP2, respectively, within the corresponding mediation model (Figure 2A, B). The mediator was defined as within-subject change in (A) FA (ΔFA) within the mediation model structure for NF-L, and (B) leptin levels (Δleptin) within the mediation model structure for FA (ΔFA). The predictor was defined as change in BMI-SDS (ΔBMI-SDS) within both mediation model structures (details in legend of Figure 2). Analyses were restricted to participants with AN with complete blood-based protein marker concentrations at both timepoints.

Study data were managed using Research Electronic Data Capture (REDCap) 30. Analyses of blood-based protein marker levels, demographic and clinical variables as well as analyses of FA and of relationships between FA and marker levels were carried out using the software R (v4.3.1) 31. LME model analyses were performed using the R package “lme4” 32. Final models were estimated with restricted maximum likelihood and significance testing of model coefficients employed Satterthwaite's approximation for degrees of freedom 33. Mediation and sensitivity analyses were performed using the R package “mediation” 29,34.

## *1.8 Sensitivity analyses*

Supplementary LME models used FA values obtained from standard preprocessed images, rather than free-water-corrected images in fornix-related ROIs. Free-water-corrected FA was used in the main LME model (Figure 1) across all ROIs because FA in the fornix has been found to be susceptible to cerebrospinal ﬂuid-induced partial volume effects 35.

# **Supplementary Results**

## *2.1 Study sample and clinical measures*

The sample characteristics summarized in Table 1 of the main manuscript included 74 patients with AN at both timepoints. Since additional 27 patients with AN only participated at TP1, Supplementary Table 1 summarizes their characteristics (Group 2) in comparison to the other patients (Group 1). These group comparisons in the AN-TP1 sample were conducted using two-sample (unpaired) *t*-tests. As expected, there were no differences in clinical, demographic, or log10-transformed (and residual) blood-based protein marker levels between Group 1 and 2.

## *2.2 Differences using free-water-corrected vs. -uncorrected FA values*

Following Meteyard & Davies 33, Supplementary Table 2 shows the result of all model-based hypothesis tests of the prespecified contrasts (AN‑TP1–HC, AN‑TP2–AN‑TP1, AN‑TP2–HC) computed separately for each ROI. Pairwise comparisons were obtained from the main LME models assessing short-term weight-restoration-related change in individual mean FA across all groups. To assess the influence of free water on group differences found in fornix-related ROIs using free-water-corrected FA values, supplementary LME models were run using uncorrected FA values (Supplementary Table 3). Notably, both longitudinal and cross-sectional (AN-TP1–HC) differences in FA within the column and body of the fornix remained significant in the absence of free-water correction, whereas no significant effect was observed for the left fornix/stria terminalis subcomponent, in contrast to the main model. However, free-water correction significantly increased the mean FA in all three ROIs within each study group (Supplementary Table 4).

## *2.3 Association between ΔNF‑L, ΔBDNF, and Δleptin and longitudinal FA changes over and above BMI-SDS*

The main LME model was modified to investigate longitudinal associations of change scores in NF-L (log10-transformed), BDNF (both log10-transformed and adjusted for batch and storage time effects), and leptin (log10-transformed) with FA in AN. ΔNF‑L and Δleptin had significant effects above and beyond the increasing BMI on change in FA in five different ROIs (Figure 2). Beyond these main findings, several additional ROIs showed trends (*p*<0.05, uncorrected) linking both decreases in NF-L and increases in leptin concentrations to FA decrease over or beyond the BMI-SDS effect (Supplementary Table 5). Although mean BDNF levels did not change from AN-TP1 to AN-TP2 (Table 1), individual BDNF change scores showed variability. Still, ΔBDNF had no significant effect on longitudinal differences in any ROI above or beyond the BMI-SDS effect after FDR correction across ROIs. However, decreases in BDNF levels showed a trend towards positive effects above or beyond increasing BMI-SDS on FA decreases in the right posterior thalamic radiation (β=0.033, 95% CI [0.006, 1.193], *p*=0.048). Robustness of nearly all main findings was confirmed by supplementary LME models testing associations between changes in all blood-based protein markers on longitudinal FA alterations in all ROIs, after removing participants with AN taking selective serotonin reuptake inhibitors (SSRIs) or mirtazapine and, in a separate analysis, those with comorbidities. All FDR-corrected results were unchanged apart from one, where by the effect of Δleptin was no longer significant in the right inferior cerebellar peduncle after excluding six participants taking SSRIs/mirtazapine (Supplementary Table 6). After removing 16 AN-TP1 and four AN-TP2 participants with comorbidities, all main findings were retained at FDR-corrected significance (Supplementary Table 7).

Subsequent mediation analyses showed that leptin concentration increases mediated the relationship between weight gain and FA decreases following short-term weight restoration in the right external capsule, right inferior cerebellar peduncle, right posterior limb of internal capsule, and right superior longitudinal fasciculus (indirect effects; Figure 2). According to sensitivity analyses 29, these significant average causal mediation effects (ACMEs) through Δleptin remain robust to a moderate unmeasured confounding (for all ROIs: *ρ*≤–0.3).

# **Supplementary Tables**

## **Supplementary Table 1: Descriptive statistics and group comparisons summary of the AN-TP1 study sample**

|  | **Acute AN group pre-treatment** | | **Contrast Group1–Group2** | |
| --- | --- | --- | --- | --- |
| Characteristic | Mean ± SD (Group 1) | Mean ± SD (Group 2) | statistic | *q* |
| Age (years) | 16.18 ± 2.58 | 17.25 ± 4.48 | -1.06 | 0.785 (n.s.) |
| IQ | 114.88 ± 12.44 | 111.77 ± 10.92 | 1.14 | 0.785 (n.s.) |
| BMI (kg/m2) | 14.8 ± 1.31 | 14.71 ± 1.48 | 0.27 | 0.907 (n.s.) |
| BMI-SDS | -3.12 ± 1.14 | -3.36 ± 1.64 | 0.7 | 0.785 (n.s.) |
| Minimal lifetime BMI (kg/m2) | 14.59 ± 1.36 | 13.9 ± 1.27 | 2.36 | 0.223 (n.s.) |
| EDI-2 core symptoms | 25.54 ± 7.01 | 26.68 ± 6.35 | -0.77 | 0.785 (n.s.) |
| BDI-II total | 22.03 ± 10.82 | 22.55 ± 10.81 | -0.22 | 0.907 (n.s.) |
| Blood-based markers | Median ± IQR (Group 1) | Median ± IQR (Group 2) |  |  |
| NF-L (pg/mL) | 10.85 ± 7.81 | 11 ± 8.05 | -0.6 | 0.785 (n.s.) |
| BDNF (ng/mL) | 20.63 ± 6.84 | 22.42 ± 6.34 | -0.74 | 0.785 (n.s.) |
| Leptin (ng/mL) | 0.58 ± 1.66 | 0.71 ± 2.49 | -0.12 | 0.907 (n.s.) |

*Note*: Mean ± SD are stated for each variable and both AN-TP1 study groups: Group 1 included 74 patients with AN who were reassessed after short-term weight restoration (TP2); Group 2 included 27 patients with AN who only participated in TP1. Group differences were tested using Welch’s two-sample *t*-tests. *P*-values were adjusted for multiple comparisons using the FDR 36 procedure, resulting in *q*-values being stated. Blood-based protein marker concentrations were transformed to approximate normality: NF-L, BDNF, and leptin were log10-transformed. In case of significant batch and storage time effects, marker concentrations were subsequently residualized using multiple linear regression (Supplementary Methods 1.7). For better interpretability, median ± IQR of the raw blood-based protein marker values are displayed. However, group comparisons were computed with (residualized) log10-transformed marker values as described. Significance levels are indicated as follows: (n.s.), nonsignificant; *, *q*<0.05; **, *q*<0.01; ***, *q*<0.001. Abbreviations: AN, anorexia nervosa; BDI-II total, total score of Beck Depression Inventory-II; BDNF, brain-derived neurotrophic factor; BMI(-SDS), body mass index(-standard deviation score); EDI-2 core, averaged score comprising the core subscales drive for thinness, body dissatisfaction, and bulimia of Eating Disorder Inventory-2; FDR, false discovery rate; IQ, intelligence quotient; IQR, Interquartile range; NF‑L, neurofilament light; TP, timepoint.

## **Supplementary Table 2: Pairwise contrasts from the main LME models**

| ROI | AN-TP1 – HC | | | | | | AN-TP2 – AN-TP1 | | | | | | AN-TP2 – HC | | | | | | Model Random Intercept | |
| --- | --- | --- | --- | --- | --- | --- | --- | --- | --- | --- | --- | --- | --- | --- | --- | --- | --- | --- | --- | --- |
|  | β | SE | 95% CI | *t* | *p* | *q* | β | SE | 95 % CI | *t* | *p* | *q* | β | SE | 95 % CI | *t* | *p* | *q* | variance | SD |
| Cerebral peduncle lh | 0.009 | 0.002 | 0.005 - 0.013 | 4.396 | <0.001 | <0.001 | -0.008 | 0.001 | -0.010 - -0.006 | -6.504 | <0.001 | <0.001 | 0.001 | 0.002 | -0.003 - 0.005 | 0.496 | 0.620 | 0.685 | 0.00017 | 0.01295 |
| Cerebral peduncle rh | 0.010 | 0.002 | 0.006 - 0.015 | 4.516 | <0.001 | <0.001 | -0.007 | 0.002 | -0.011 - -0.004 | -4.536 | <0.001 | <0.001 | 0.003 | 0.002 | -0.002 - 0.007 | 1.168 | 0.244 | 0.336 | 0.00016 | 0.01270 |
| Superior cerebellar peduncle lh | 0.013 | 0.003 | 0.006 - 0.019 | 3.797 | <0.001 | <0.001 | -0.007 | 0.002 | -0.012 - -0.002 | -2.951 | 0.004 | 0.010 | 0.006 | 0.003 | -0.001 - 0.013 | 1.638 | 0.102 | 0.174 | 0.00037 | 0.01916 |
| Superior cerebellar peduncle rh | 0.013 | 0.003 | 0.006 - 0.019 | 3.836 | <0.001 | <0.001 | -0.006 | 0.002 | -0.011 - -0.002 | -2.795 | 0.006 | 0.016 | 0.006 | 0.003 | 0 - 0.013 | 1.862 | 0.064 | 0.119 | 0.00039 | 0.01965 |
| Medial lemniscus lh | -0.001 | 0.004 | -0.009 - 0.007 | -0.295 | 0.768 | 0.809 | -0.007 | 0.003 | -0.012 - -0.002 | -2.621 | 0.010 | 0.024 | -0.008 | 0.004 | -0.016 - 0 | -1.866 | 0.063 | 0.119 | 0.00064 | 0.02531 |
| Medial lemniscus rh | 0.004 | 0.004 | -0.004 - 0.012 | 1.073 | 0.284 | 0.377 | -0.009 | 0.002 | -0.014 - -0.005 | -4.174 | <0.001 | <0.001 | -0.005 | 0.004 | -0.013 - 0.003 | -1.213 | 0.226 | 0.322 | 0.00066 | 0.02572 |
| Inferior cerebellar peduncle lh | 0.004 | 0.004 | -0.004 - 0.012 | 1.029 | 0.304 | 0.396 | -0.008 | 0.002 | -0.013 - -0.004 | -3.610 | <0.001 | 0.002 | -0.004 | 0.004 | -0.012 - 0.004 | -0.976 | 0.330 | 0.410 | 0.00067 | 0.02589 |
| Inferior cerebellar peduncle rh | 0.006 | 0.004 | -0.002 - 0.015 | 1.527 | 0.128 | 0.208 | -0.011 | 0.002 | -0.015 - -0.006 | -4.661 | <0.001 | <0.001 | -0.004 | 0.004 | -0.013 - 0.004 | -0.986 | 0.325 | 0.410 | 0.00075 | 0.02735 |
| Corticospinal tract lh | 0.009 | 0.005 | -0.002 - 0.019 | 1.645 | 0.101 | 0.174 | -0.009 | 0.002 | -0.014 - -0.004 | -3.666 | <0.001 | 0.001 | <0.001 | 0.005 | -0.011 - 0.010 | -0.053 | 0.958 | 0.965 | 0.00127 | 0.03562 |
| Corticospinal tract rh | 0.007 | 0.005 | -0.002 - 0.017 | 1.517 | 0.131 | 0.210 | -0.009 | 0.003 | -0.014 - -0.004 | -3.629 | <0.001 | 0.002 | -0.002 | 0.005 | -0.012 - 0.008 | -0.326 | 0.745 | 0.797 | 0.00105 | 0.03244 |
| Genu of corpus callosum | 0.004 | 0.003 | -0.002 - 0.009 | 1.344 | 0.180 | 0.265 | -0.008 | 0.001 | -0.010 - -0.005 | -5.884 | <0.001 | <0.001 | -0.004 | 0.003 | -0.010 - 0.002 | -1.359 | 0.175 | 0.263 | 0.00036 | 0.01894 |
| Body of corpus callosum | -0.007 | 0.003 | -0.012 - -0.001 | -2.347 | 0.020 | 0.042 | 0.001 | 0.002 | -0.002 - 0.005 | 0.800 | 0.426 | 0.498 | -0.005 | 0.003 | -0.011 - 0 | -1.834 | 0.068 | 0.123 | 0.00033 | 0.01825 |
| Splenium of corpus callosum | 0.005 | 0.003 | 0 - 0.011 | 1.845 | 0.066 | 0.122 | -0.005 | 0.001 | -0.007 - -0.002 | -3.426 | <0.001 | 0.003 | 0.001 | 0.003 | -0.005 - 0.006 | 0.222 | 0.825 | 0.856 | 0.00038 | 0.01958 |
| Anterior corona radiata lh | 0.003 | 0.003 | -0.003 - 0.009 | 0.995 | 0.321 | 0.410 | -0.007 | 0.001 | -0.010 - -0.005 | -5.616 | <0.001 | <0.001 | -0.004 | 0.003 | -0.010 - 0.002 | -1.381 | 0.168 | 0.258 | 0.00043 | 0.02075 |
| Anterior corona radiata rh | 0.005 | 0.003 | -0.002 - 0.011 | 1.475 | 0.142 | 0.225 | -0.009 | 0.001 | -0.012 - -0.006 | -6.954 | <0.001 | <0.001 | -0.004 | 0.003 | -0.011 - 0.002 | -1.387 | 0.167 | 0.258 | 0.00046 | 0.02153 |
| Superior corona radiata lh | 0.001 | 0.003 | -0.004 - 0.007 | 0.374 | 0.708 | 0.770 | -0.010 | 0.001 | -0.011 - -0.008 | -9.764 | <0.001 | <0.001 | -0.008 | 0.003 | -0.014 - -0.003 | -2.989 | 0.003 | 0.009 | 0.00039 | 0.01982 |
| Superior corona radiata rh | 0.003 | 0.003 | -0.002 - 0.009 | 1.139 | 0.256 | 0.346 | -0.012 | 0.001 | -0.014 - -0.009 | -10.605 | <0.001 | <0.001 | -0.008 | 0.003 | -0.014 - -0.003 | -2.954 | 0.003 | 0.009 | 0.00038 | 0.01950 |
| Posterior corona radiata lh | 0.001 | 0.003 | -0.005 - 0.007 | 0.478 | 0.633 | 0.693 | -0.008 | 0.001 | -0.010 - -0.006 | -6.989 | <0.001 | <0.001 | -0.006 | 0.003 | -0.012 - 0 | -2.045 | 0.042 | 0.085 | 0.00045 | 0.02126 |
| Posterior corona radiata rh | -0.001 | 0.003 | -0.008 - 0.006 | -0.209 | 0.835 | 0.860 | -0.008 | 0.001 | -0.010 - -0.005 | -6.343 | <0.001 | <0.001 | -0.008 | 0.003 | -0.015 - -0.002 | -2.439 | 0.015 | 0.033 | 0.00059 | 0.02428 |
| Anterior limb of internal capsule lh | 0.008 | 0.003 | 0.002 - 0.013 | 2.923 | 0.004 | 0.010 | -0.008 | 0.001 | -0.011 - -0.005 | -5.170 | <0.001 | <0.001 | <0.001 | 0.003 | -0.005 - 0.005 | -0.026 | 0.979 | 0.979 | 0.00028 | 0.01663 |
| Anterior limb of internal capsule rh | 0.009 | 0.003 | 0.003 - 0.014 | 3.254 | 0.001 | 0.004 | -0.007 | 0.001 | -0.010 - -0.004 | -5.182 | <0.001 | <0.001 | 0.001 | 0.003 | -0.004 - 0.007 | 0.541 | 0.589 | 0.677 | 0.00031 | 0.01766 |
| Posterior limb of internal capsule lh | 0.003 | 0.002 | -0.001 - 0.008 | 1.354 | 0.177 | 0.263 | -0.006 | 0.001 | -0.008 - -0.004 | -6.731 | <0.001 | <0.001 | -0.003 | 0.002 | 0.007 - 0.002 | -1.201 | 0.231 | 0.325 | 0.00026 | 0.01625 |
| Posterior limb of internal capsule rh | 0.004 | 0.003 | -0.001 - 0.009 | 1.606 | 0.109 | 0.183 | -0.009 | 0.001 | -0.011 - -0.006 | -6.774 | <0.001 | <0.001 | -0.005 | 0.003 | -0.010 - 0 | -1.793 | 0.074 | 0.133 | 0.00028 | 0.01660 |
| Retrolenticular part of internal capsule lh | 0.008 | 0.003 | 0.002 - 0.015 | 2.604 | 0.010 | 0.022 | -0.011 | 0.001 | -0.014 - -0.009 | -9.100 | <0.001 | <0.001 | -0.003 | 0.003 | -0.009 - 0.003 | -0.977 | 0.329 | 0.410 | 0.00049 | 0.02207 |
| Retrolenticular part of internal capsule rh | 0.010 | 0.003 | 0.003 - 0.016 | 2.948 | 0.004 | 0.009 | -0.014 | 0.001 | -0.017 - -0.012 | -11.043 | <0.001 | <0.001 | -0.005 | 0.003 | -0.011 - 0.002 | -1.393 | 0.165 | 0.258 | 0.00053 | 0.02299 |
| Posterior thalamic radiation lh | 0.012 | 0.004 | 0.004 - 0.020 | 2.933 | 0.004 | 0.010 | -0.010 | 0.002 | -0.014 - -0.007 | -6.355 | <0.001 | <0.001 | 0.001 | 0.004 | -0.007 - 0.009 | 0.312 | 0.756 | 0.802 | 0.00076 | 0.02752 |
| Posterior thalamic radiation rh | 0.015 | 0.004 | 0.007 - 0.022 | 3.677 | <0.001 | <0.001 | -0.012 | 0.001 | -0.015 - -0.010 | -9.288 | <0.001 | <0.001 | 0.002 | 0.004 | -0.006 - 0.010 | 0.533 | 0.595 | 0.678 | 0.00079 | 0.02811 |
| Sagittal stratum lh | 0.018 | 0.003 | 0.011 - 0.025 | 5.313 | <0.001 | <0.001 | -0.015 | 0.002 | -0.019 - -0.012 | -8.572 | <0.001 | <0.001 | 0.003 | 0.003 | -0.004 - 0.010 | 0.841 | 0.401 | 0.473 | 0.00050 | 0.02229 |
| Sagittal stratum rh | 0.016 | 0.003 | 0.009 - 0.022 | 4.783 | <0.001 | <0.001 | -0.017 | 0.002 | -0.020 - -0.013 | -10.534 | <0.001 | <0.001 | -0.001 | 0.003 | -0.007 - 0.006 | -0.194 | 0.846 | 0.865 | 0.00050 | 0.02239 |
| External capsule lh | 0.005 | 0.002 | 0 - 0.010 | 2.039 | 0.042 | 0.085 | -0.006 | 0.001 | -0.008 - -0.004 | -5.502 | <0.001 | <0.001 | -0.001 | 0.002 | -0.006 - 0.004 | -0.508 | 0.612 | 0.681 | 0.00026 | 0.01610 |
| External capsule rh | 0.006 | 0.002 | 0.002 - 0.010 | 2.743 | 0.007 | 0.016 | -0.009 | 0.001 | -0.011 - -0.006 | -6.997 | <0.001 | <0.001 | -0.003 | 0.002 | -0.007 - 0.002 | -1.247 | 0.213 | 0.307 | 0.00019 | 0.01361 |
| Superior longitudinal fasciculus lh | 0.006 | 0.003 | 0.001 - 0.011 | 2.512 | 0.013 | 0.028 | -0.009 | 0.001 | -0.011 - -0.007 | -9.604 | <0.001 | <0.001 | -0.003 | 0.003 | -0.008 - 0.002 | -1.082 | 0.280 | 0.375 | 0.00031 | 0.01752 |
| Superior longitudinal fasciculus rh | 0.005 | 0.003 | 0 - 0.010 | 2.046 | 0.042 | 0.085 | -0.010 | 0.001 | -0.011 - -0.008 | -10.607 | <0.001 | <0.001 | -0.004 | 0.003 | -0.009 - 0.001 | -1.741 | 0.083 | 0.145 | 0.00032 | 0.01781 |
| Inferior fronto-occipital fasciculus lh | 0.010 | 0.003 | 0.003 - 0.016 | 2.813 | 0.005 | 0.013 | -0.008 | 0.002 | -0.011 - -0.005 | -4.934 | <0.001 | <0.001 | 0.002 | 0.003 | -0.005 - 0.009 | 0.516 | 0.606 | 0.680 | 0.00053 | 0.02313 |
| Inferior fronto-occipital fasciculus rh | 0.006 | 0.003 | 0 - 0.013 | 1.996 | 0.047 | 0.093 | -0.006 | 0.001 | -0.009 - -0.003 | -3.884 | <0.001 | <0.001 | 0.001 | 0.003 | -0.006 - 0.007 | 0.228 | 0.820 | 0.856 | 0.00049 | 0.02209 |
| Superior fronto-occipital fasciculus lh | 0.005 | 0.005 | -0.006 - 0.015 | 0.854 | 0.394 | 0.472 | -0.004 | 0.004 | -0.012 - 0.004 | -1.012 | 0.314 | 0.406 | 0.001 | 0.006 | -0.011 - 0.012 | 0.113 | 0.910 | 0.923 | 0.00094 | 0.03059 |
| Superior fronto-occipital fasciculus rh | 0.009 | 0.005 | 0 - 0.018 | 1.962 | 0.051 | 0.099 | -0.013 | 0.004 | -0.020 - -0.006 | -3.524 | <0.001 | 0.002 | -0.004 | 0.005 | -0.014 - 0.005 | -0.874 | 0.383 | 0.466 | 0.00050 | 0.02229 |
| Uncinate fasciculus lh | -0.003 | 0.006 | -0.014 - 0.008 | -0.522 | 0.602 | 0.680 | -0.005 | 0.003 | -0.010 - 0 | -1.949 | 0.055 | 0.105 | -0.008 | 0.006 | -0.019 - 0.004 | -1.358 | 0.175 | 0.263 | 0.00155 | 0.03931 |
| Uncinate fasciculus rh | 0.007 | 0.005 | -0.003 - 0.017 | 1.333 | 0.184 | 0.267 | -0.012 | 0.003 | -0.018 - -0.006 | -3.749 | <0.001 | 0.001 | -0.005 | 0.005 | -0.015 - 0.006 | -0.849 | 0.396 | 0.472 | 0.00112 | 0.03346 |
| Fornix (column and body of fornix) | -0.081 | 0.011 | -0.102 - -0.060 | -7.677 | <0.001 | <0.001 | 0.063 | 0.007 | 0.048 - 0.078 | 8.482 | <0.001 | <0.001 | -0.018 | 0.011 | -0.039 - 0.004 | -1.603 | 0.110 | 0.183 | 0.00365 | 0.06039 |
| Fornix (cres) / Stria terminalis lh | -0.011 | 0.004 | -0.020 - -0.003 | -2.665 | 0.008 | 0.019 | 0.007 | 0.003 | 0.001 - 0.012 | 2.533 | 0.013 | 0.028 | -0.005 | 0.004 | -0.013 - 0.004 | -1.040 | 0.299 | 0.393 | 0.00070 | 0.02654 |
| Fornix (cres) / Stria terminalis rh | -0.004 | 0.005 | -0.013 - 0.005 | -0.870 | 0.385 | 0.466 | 0.002 | 0.003 | -0.004 - 0.008 | 0.727 | 0.469 | 0.544 | -0.002 | 0.005 | -0.011 - 0.008 | -0.358 | 0.720 | 0.777 | 0.00072 | 0.02686 |
| Cingulum (cingulate gyrus) lh | -0.012 | 0.004 | -0.019 - -0.004 | -3.009 | 0.003 | 0.008 | 0.002 | 0.002 | -0.002 - 0.007 | 0.967 | 0.336 | 0.414 | -0.009 | 0.004 | -0.017 - -0.001 | -2.314 | 0.021 | 0.045 | 0.00058 | 0.02401 |
| Cingulum (cingulate gyrus) rh | -0.010 | 0.004 | -0.018 - -0.003 | -2.617 | 0.009 | 0.022 | 0.004 | 0.002 | -0.001 - 0.009 | 1.763 | 0.081 | 0.144 | -0.006 | 0.004 | -0.014 - 0.002 | -1.555 | 0.121 | 0.199 | 0.00064 | 0.02532 |
| Cingulum (hippocampus) lh | 0.025 | 0.006 | 0.013 - 0.036 | 4.326 | <0.001 | <0.001 | -0.018 | 0.003 | -0.024 - -0.012 | -5.749 | <0.001 | <0.001 | 0.007 | 0.006 | -0.005 - 0.018 | 1.172 | 0.242 | 0.336 | 0.00137 | 0.03696 |
| Cingulum (hippocampus) rh | 0.030 | 0.006 | 0.018 - 0.042 | 4.844 | <0.001 | <0.001 | -0.023 | 0.003 | -0.030 - -0.016 | -6.536 | <0.001 | <0.001 | 0.007 | 0.006 | -0.005 - 0.020 | 1.162 | 0.246 | 0.336 | 0.00161 | 0.04017 |

*Note:* Values are model-based hypothesis tests of the prespecified contrasts (AN-TP1–HC, AN-TP2–AN-TP1, and AN-TP2–HC) computed separately for each ROI. ROIs associated with tracts in the brainstem, corpus callosum, projection fibers, association fibers, and limbic fibers are highlighted in yellow, orange, pink, purple, and light green, respectively. Reported are the contrast estimate (β; difference in adjusted marginal means), standard error (SE), *t*-statistic, 95% confidence interval (CI), unadjusted *p*-value, FDR-*q* (FDR-adjustment across all contrasts and all ROIs), and random intercept variance (between-participant variability) as well as standard deviation (SD) following Meteyard & Davies 33. Pairwise comparisons were obtained from the main LME models. These results correspond to the hypothesis tests of contrasts that were performed and are not an exact tabulation of the bar plot values shown in Figure 1 of the main manuscript. Significant associations are highlighted in gray.Abbreviations: AN, anorexia nervosa; AN-TP1, participants with acute AN in the acutely underweight state; AN-TP2, participants with AN reassessed after short-term weight restoration; HC, healthy control participants; lh, left hemisphere; rh, right hemisphere; ROI, region of interest; TP, timepoint.

## **Supplementary Table 3: Pairwise contrasts from LME models using uncorrected FA values in fornix-related ROIs**

| Fornix-related ROIs | AN-TP1 – HC | | | | | | AN-TP2 – AN-TP1 | | | | | | AN-TP2 – HC | | | | | | Model Random Intercept | |
| --- | --- | --- | --- | --- | --- | --- | --- | --- | --- | --- | --- | --- | --- | --- | --- | --- | --- | --- | --- | --- |
|  | β | SE | 95% CI | *t* | *p* | *q* | β | SE | 95% CI | *t* | *p* | *q* | β | SE | 95% CI | *t* | *p* | *q* | variance | SD |
| Fornix (column and body of fornix) | -0.034 | 0.008 | -0.049 - -0.019 | -4.474 | <0.001 | <0.001 | 0.034 | 0.004 | 0.026 - 0.042 | 8.402 | <0.001 | <0.001 | <0.001 | 0.008 | -0.016 - 0.015 | -0.045 | 0.964 | 0.964 | 0.00249 | 0.04989 |
| Fornix (cres) / Stria terminalis lh | -0.001 | 0.005 | -0.012 - 0.009 | -0.262 | 0.794 | 0.964 | 0.001 | 0.004 | -0.006 - 0.008 | 0.261 | 0.795 | 0.964 | <0.001 | 0.006 | -0.012 - 0.011 | -0.082 | 0.935 | 0.964 | 0.00103 | 0.03209 |
| Fornix (cres) / Stria terminalis rh | 0.005 | 0.006 | -0.007 - 0.017 | 0.846 | 0.398 | 0.896 | -0.008 | 0.005 | -0.017 - 0.001 | -1.770 | 0.080 | 0.240 | -0.003 | 0.006 | -0.015 - 0.01 | -0.468 | 0.640 | 0.964 | 0.00106 | 0.03253 |

*Note:* Values are model-based hypothesis tests of the prespecified contrasts (AN-TP1–HC, AN-TP2–AN-TP1, and AN-TP2–HC) computed separately for each fornix-related ROI. ROIs associated with limbic fibers are highlighted in light green. Reported are the contrast estimate (β; difference in adjusted marginal means), standard error (SE), *t*-statistic, 95% confidence interval (CI), unadjusted *p*-value, FDR-*q* (FDR-adjustment across all contrasts and all ROIs), and random intercept variance (between-participant variability) as well as standard deviation (SD) following Meteyard & Davies 33. Pairwise comparisons were obtained from the main LME models using free-water-uncorrected mean FA values. Significant associations are highlighted in gray.Abbreviations: AN, anorexia nervosa; AN-TP1, participants with acute AN in the acutely underweight state; AN-TP2, participants with AN reassessed after short-term weight restoration; HC, healthy control participants; lh, left hemisphere; rh, right hemisphere; ROI, region of interest; TP, timepoint.

## **Supplementary Table 4: Comparisons of mean FA without and with free-water correction in fornix-related ROIs**

|  | **AN-TP1** | | **AN-TP2** | | **HC** | | **Statistical Tests** | | |
| --- | --- | --- | --- | --- | --- | --- | --- | --- | --- |
| **Fornix-related ROIs** | Mean ± SD (FA no fwc) | Mean ± SD (FA fwc) | Mean ± SD (FA no fwc) | Mean ± SD (FA fwc) | Mean ± SD (FA no fwc) | Mean ± SD (FA fwc) | AN-TP1 | AN-TP2 | HC |
| Fornix (column and body of fornix) | 0.646 ± 0.063 | 0.721 ± 0.108 | 0.679 ± 0.049 | 0.783 ± 0.063 | 0.684 ± 0.054 | 0.803 ± 0.058 | *t*(100) = -9.78,  *q* < 0.001 *** | *t*(73) = -16.76,  *q* < 0.001 *** | *t*(146) = -28.81,  *q* < 0.001 *** |
| Fornix (cres) / Stria terminalis lh | 0.660 ± 0.043 | 0.777 ± 0.037 | 0.659 ± 0.039 | 0.783 ± 0.034 | 0.667 ± 0.041 | 0.792 ± 0.029 | *t*(100) = -26.71,  *q* < 0.001 *** | *t*(73) = -41.18,  *q* < 0.001 *** | *t*(146) = -58.74,  *q* < 0.001 *** |
| Fornix (cres) / Stria terminalis rh | 0.686 ± 0.046 | 0.794 ± 0.035 | 0.678 ± 0.042 | 0.794 ± 0.031 | 0.686 ± 0.046 | 0.802 ± 0.035 | *t*(100) = -31.11,  *q* < 0.001 *** | *t*(73) = -42.66,  *q* < 0.001 *** | *t*(146) = -50.88,  *q* < 0.001 *** |

*Note*: Mean ± SD of mean FA values are stated separately for each study group and each ROI. Within-group differences were tested using paired *t*-tests separately for each study group and each ROI. Comparisons were performed between the uncorrected and free-water-corrected (fwc) FA values for the three fornix-related ROIs. *P*-values were adjusted for multiple comparisons using the FDR (Benjamini & Hochberg, 1995) procedure, resulting in *q*-values being stated. Test statistics (*t*), degrees of freedom, and *q*-values are reported. Significance levels are indicated as follows: (n.s.), nonsignificant; *, *q*<0.05; **, *q*<0.01; ***, *q*<0.001. Abbreviations: AN, anorexia nervosa; AN-TP1, participants with acute AN in the acutely underweight state; AN-TP2, participants with AN reassessed after short-term weight restoration; FDR, false discovery rate; fwc, free-water correction; ROI, region of interest; TP, timepoint.

## **Supplementary Table 5:** **LME model results for longitudinal associations between change in blood-based protein marker levels and change in FA following short-term weight restoration in AN**

| **ROIs showing significant longitudinal FA differences (AN‑TP2–AN‑TP1)** |  | | | | | | | | | | | | | | | | | | | | | | | | | | |
| --- | --- | --- | --- | --- | --- | --- | --- | --- | --- | --- | --- | --- | --- | --- | --- | --- | --- | --- | --- | --- | --- | --- | --- | --- | --- | --- | --- |
| **A** | | | **∆NF‑L** | | | | | | **B** | | | **∆BDNF** | | | | | | **C** | | | **∆leptin** | | | | | |
| **β** | **SE** | **95% CI** | | | ***t*** | ***p*** | ***q*** | ***d*** | **β** | **SE** | **95% CI** | | | ***t*** | ***p*** | ***q*** | ***d*** | **β** | **SE** | **95% CI** | | | ***t*** | ***p*** | ***q*** | ***d*** |
| Cerebral peduncle lh | 0.0017 | 0.0100 | -0.4239 - | | 0.5037 | 0.1692 | 0.866 | 0.962 | 0.04 | 0.0196 | 0.0173 | -0.1961 - | | 0.7233 | 1.1328 | 0.261 | 0.930 | 0.26 | -0.0022 | 0.0030 | -0.6269 - | | 0.2913 | -0.7200 | 0.474 | 0.702 | 0.17 |
| Cerebral peduncle rh | 0.0196 | 0.0122 | -0.0851 - | | 0.8218 | 1.6108 | 0.111 | 0.405 | 0.37 | 0.0276 | 0.0201 | -0.1417 - | | 0.7848 | 1.3738 | 0.174 | 0.930 | 0.32 | 0.0016 | 0.0037 | -0.3466 - | | 0.5463 | 0.4399 | 0.661 | 0.792 | 0.10 |
| Superior cerebellar peduncle lh | 0.0085 | 0.0181 | -0.3255 - | | 0.5311 | 0.4722 | 0.638 | 0.773 | 0.10 | 0.0326 | 0.0299 | -0.1868 - | | 0.6478 | 1.0893 | 0.279 | 0.930 | 0.23 | -0.0113 | 0.0053 | -0.902 8 - | | -0.0259 | -2.1100 | 0.038 | 0.089 | 0.47 |
| Superior cerebellar peduncle rh | 0.0110 | 0.0173 | -0.2902 - | | 0.5667 | 0.6350 | 0.527 | 0.680 | 0.14 | 0.0163 | 0.0289 | -0.3040 - | | 0.5478 | 0.5633 | 0.575 | 0.937 | 0.12 | -0.0119 | 0.0051 | -0.9705 - | | -0.0770 | -2.3440 | 0.022 | 0.078 | 0.53 |
| Medial lemniscus lh | 0.0288 | 0.0195 | -0.1226 - | | 0.8357 | 1.4755 | 0.145 | 0.445 | 0.36 | -0.0083 | 0.0333 | -0.5487 - | | 0.4257 | -0.2486 | 0.804 | 0.986 | 0.06 | -0.0153 | 0.0062 | -1.0484 - | | -0.1054 | -2.4559 | 0.016 | 0.078 | 0.58 |
| Medial lemniscus rh | 0.0313 | 0.0180 | -0.0637 - | | 0.9213 | 1.7327 | 0.088 | 0.352 | 0.43 | 0.0373 | 0.0299 | -0.1897 - | | 0.8344 | 1.2469 | 0.217 | 0.930 | 0.32 | -0.0090 | 0.0056 | -0.8677 - | | 0.0911 | -1.6082 | 0.112 | 0.225 | 0.39 |
| Inferior cerebellar peduncle lh | -0.0176 | 0.0171 | -0.7379 - | | 0.2334 | -1.0258 | 0.309 | 0.561 | 0.25 | -0.0316 | 0.0277 | -0.7892 - | | 0.2119 | -1.1408 | 0.258 | 0.930 | 0.29 | -0.0036 | 0.0054 | -0.6193 - | | 0.3077 | -0.6622 | 0.510 | 0.703 | 0.16 |
| Inferior cerebellar peduncle rh | 0.0197 | 0.0175 | -0.2134 - | | 0.7810 | 1.1289 | 0.263 | 0.527 | 0.28 | 0.0132 | 0.0293 | -0.3827 - | | 0.6092 | 0.4498 | 0.654 | 0.937 | 0.11 | -0.0166 | 0.0055 | -1.2375 - | | -0.2445 | -3.0350 | 0.003 | 0.034 | 0.74 |
| Corticospinal tract lh | -0.0254 | 0.0179 | -0.9429 - | | 0.1574 | -1.4192 | 0.162 | 0.462 | 0.39 | -0.0171 | 0.0294 | -0.7271 - | | 0.3966 | -0.5805 | 0.564 | 0.937 | 0.17 | 0.0017 | 0.0056 | -0.4401 - | | 0.5991 | 0.3013 | 0.764 | 0.799 | 0.08 |
| Corticospinal tract rh | 0.0350 | 0.0166 | 0.0259 - | | 1.1269 | 2.1040 | 0.040 | 0.343 | 0.58 | -0.0203 | 0.0282 | -0.7656 - | | 0.3562 | -0.7209 | 0.474 | 0.937 | 0.21 | -0.0092 | 0.0051 | -1.0169 - | | 0.0478 | -1.8181 | 0.074 | 0.165 | 0.49 |
| Genu of corpus callosum | 0.0130 | 0.0100 | -0.1796 - | | 0.8712 | 1.3054 | 0.197 | 0.493 | 0.35 | 0.0198 | 0.0156 | -0.1988 - | | 0.9131 | 1.2754 | 0.208 | 0.930 | 0.36 | -0.0019 | 0.0029 | -0.6921 - | | 0.3400 | -0.6727 | 0.504 | 0.703 | 0.18 |
| Splenium of corpus callosum | -0.0004 | 0.0113 | -0.5227 - | | 0.5059 | -0.0323 | 0.974 | 0.987 | <0.01 | 0.0020 | 0.0192 | -0.4985 - | | 0.5528 | 0.1016 | 0.919 | 0.996 | 0.03 | -0.0014 | 0.0032 | -0.6116 - | | 0.3950 | -0.4238 | 0.673 | 0.792 | 0.11 |
| Anterior corona radiata lh | 0.0063 | 0.0095 | -0.3546 - | | 0.7148 | 0.6646 | 0.509 | 0.679 | 0.18 | 0.0075 | 0.0157 | -0.4219 - | | 0.6907 | 0.4765 | 0.636 | 0.937 | 0.14 | -0.0049 | 0.0030 | -0.9595 - | | 0.0909 | -1.6469 | 0.105 | 0.221 | 0.44 |
| Anterior corona radiata rh | 0.0006 | 0.0095 | -0.5269 - | | 0.5625 | 0.0643 | 0.949 | 0.987 | 0.02 | 0.0200 | 0.0155 | -0.2032 - | | 0.9503 | 1.2873 | 0.204 | 0.930 | 0.38 | -0.0065 | 0.0028 | -1.1726 - | | -0.0830 | -2.3239 | 0.024 | 0.078 | 0.63 |
| Superior corona radiata lh | 0.0084 | 0.0070 | -0.2204 - | | 0.9048 | 1.2070 | 0.233 | 0.498 | 0.34 | -0.0029 | 0.0120 | -0.6495 - | | 0.5096 | -0.2378 | 0.813 | 0.986 | 0.07 | -0.0047 | 0.0021 | -1.1767 - | | -0.0694 | -2.2689 | 0.027 | 0.078 | 0.63 |
| Superior corona radiata rh | 0.0061 | 0.0089 | -0.3615 - | | 0.7445 | 0.6835 | 0.497 | 0.679 | 0.19 | 0.0233 | 0.0143 | -0.1075 - | | 1.0543 | 1.6282 | 0.110 | 0.930 | 0.48 | -0.0027 | 0.0027 | -0.8167 - | | 0.2565 | -1.0328 | 0.306 | 0.490 | 0.28 |
| Posterior corona radiata lh | 0.0098 | 0.0082 | -0.2157 - | | 0.8812 | 1.2031 | 0.234 | 0.498 | 0.33 | -0.0002 | 0.0146 | -0.5656 - | | 0.5592 | -0.0112 | 0.991 | 0.996 | <0.01 | -0.0026 | 0.0025 | -0.8057 - | | 0.2527 | -1.0336 | 0.306 | 0.490 | 0.28 |
| Posterior corona radiata rh | 0.0115 | 0.0096 | -0.2202 - | | 0.8924 | 1.1983 | 0.236 | 0.498 | 0.34 | 0.0143 | 0.0161 | -0.3194 - | | 0.8382 | 0.8867 | 0.380 | 0.937 | 0.26 | -0.0063 | 0.0028 | -1.1652 - | | -0.0615 | -2.2395 | 0.029 | 0.078 | 0.62 |
| Anterior limb of internal capsule lh | -0.0002 | 0.0116 | -0.4737 - | | 0.4661 | -0.0160 | 0.987 | 0.987 | <0.01 | 0.0120 | 0.0195 | -0.3340 - | | 0.6387 | 0.6173 | 0.539 | 0.937 | 0.15 | -0.0091 | 0.0033 | -1.1687 - | | -0.1830 | -2.7735 | 0.007 | 0.057 | 0.68 |
| Anterior limb of internal capsule rh | 0.0042 | 0.0108 | -0.4137 - | | 0.6167 | 0.3880 | 0.699 | 0.816 | 0.10 | 0.0085 | 0.0180 | -0.4038 - | | 0.6590 | 0.4733 | 0.638 | 0.937 | 0.13 | -0.0078 | 0.0031 | -1.1694 - | | -0.1261 | -2.5072 | 0.015 | 0.078 | 0.65 |
| Posterior limb of internal capsule lh | 0.0043 | 0.0073 | -0.3743 - | | 0.6911 | 0.5865 | 0.560 | 0.700 | 0.16 | -0.0159 | 0.0117 | -0.9485 - | | 0.1780 | -1.3598 | 0.180 | 0.930 | 0.39 | -0.0033 | 0.0022 | -0.9339 - | | 0.1177 | -1.5436 | 0.128 | 0.244 | 0.41 |
| Posterior limb of internal capsule rh | 0.0181 | 0.0089 | 0.0047 - | | 1.0864 | 2.0224 | 0.048 | 0.343 | 0.55 | 0.0058 | 0.0162 | -0.4346 - | | 0.6273 | 0.3576 | 0.722 | 0.963 | 0.10 | -0.0089 | 0.0026 | -1.4465 - | | -0.3590 | -3.4301 | 0.001 | 0.023 | 0.91 |
| Retrolenticular part of internal capsule lh | 0.0164 | 0.0093 | -0.0668 - | | 1.0365 | 1.7559 | 0.085 | 0.352 | 0.49 | 0.0007 | 0.0150 | -0.5488 - | | 0.5759 | 0.0474 | 0.962 | 0.996 | 0.01 | -0.0075 | 0.0028 | -1.2582 - | | -0.1733 | -2.6791 | 0.010 | 0.065 | 0.72 |
| Retrolenticular part of internal capsule rh | 0.0259 | 0.0094 | 0.2003 - | | 1.3271 | 2.7649 | 0.008 | 0.105 | 0.77 | 0.0095 | 0.0169 | -0.4011 - | | 0.7176 | 0.5582 | 0.579 | 0.937 | 0.16 | -0.0011 | 0.0032 | -0.6086 - | | 0.4313 | -0.3359 | 0.738 | 0.799 | 0.09 |
| Posterior thalamic radiation lh | 0.0234 | 0.0134 | -0.0676 - | | 1.0068 | 1.7448 | 0.087 | 0.352 | 0.47 | 0.0036 | 0.0226 | -0.5064 - | | 0.5956 | 0.1595 | 0.874 | 0.996 | 0.04 | -0.0091 | 0.0040 | -1.1176 - | | -0.0694 | -2.2775 | 0.026 | 0.078 | 0.60 |
| Posterior thalamic radiation rh | -0.0012 | 0.0104 | -0.5794 - | | 0.5167 | -0.1128 | 0.911 | 0.984 | 0.03 | 0.0327 | 0.0161 | 0.0055 - | | 1.1934 | 2.0329 | 0.048 | 0.804 | 0.60 | -0.0034 | 0.0030 | -0.8395 - | | 0.2327 | -1.1208 | 0.267 | 0.465 | 0.30 |
| Sagittal stratum lh | 0.0355 | 0.0124 | 0.2231 - | | 1.3144 | 2.8742 | 0.006 | 0.105 | 0.77 | 0.0142 | 0.0225 | -0.3626 - | | 0.7057 | 0.6335 | 0.529 | 0.937 | 0.17 | -0.0053 | 0.0045 | -0.7776 - | | 0.1951 | -1.1843 | 0.241 | 0.437 | 0.29 |
| Sagittal stratum rh | 0.0103 | 0.0114 | -0.2840 - | | 0.7646 | 0.9056 | 0.369 | 0.562 | 0.24 | -0.0105 | 0.0179 | -0.7219 - | | 0.3923 | -0.5837 | 0.562 | 0.937 | 0.17 | -0.0022 | 0.0037 | -0.6473 - | | 0.3460 | -0.5976 | 0.552 | 0.713 | 0.15 |
| External capsule lh | -0.0064 | 0.0067 | -0.8164 - | | 0.2846 | -0.9554 | 0.344 | 0.562 | 0.27 | 0.0001 | 0.0125 | -0.5566 - | | 0.5597 | 0.0055 | 0.996 | 0.996 | <0.01 | -0.0008 | 0.0023 | -0.6169 - | | 0.4317 | -0.3478 | 0.729 | 0.799 | 0.09 |
| External capsule rh | 0.0063 | 0.0086 | -0.3101 - | | 0.6787 | 0.7349 | 0.465 | 0.664 | 0.19 | 0.0287 | 0.0150 | -0.0209 - | | 0.9878 | 1.9136 | 0.060 | 0.804 | 0.49 | -0.0079 | 0.0024 | -1.3426 - | | -0.3091 | -3.2759 | 0.002 | 0.023 | 0.83 |
| Superior longitudinal fasciculus lh | 0.0106 | 0.0069 | -0.1254 - | | 0.9699 | 1.5350 | 0.131 | 0.436 | 0.42 | -0.0062 | 0.0122 | -0.7066 - | | 0.4149 | -0.5129 | 0.610 | 0.937 | 0.15 | -0.0051 | 0.0022 | -1.1567 - | | -0.0875 | -2.3454 | 0.023 | 0.078 | 0.62 |
| Superior longitudinal fasciculus rh | 0.0058 | 0.0066 | -0.3028 - | | 0.7953 | 0.8867 | 0.379 | 0.562 | 0.25 | 0.0002 | 0.0117 | -0.5622 - | | 0.5707 | 0.0147 | 0.988 | 0.996 | <0.01 | -0.0070 | 0.0020 | -1.4843 - | | -0.3681 | -3.4373 | 0.001 | 0.023 | 0.93 |
| Inferior fronto-occipital fasciculus lh | 0.0410 | 0.0117 | 0.3744 - | | 1.4538 | 3.5029 | <0.001 | 0.036 | 0.92 | -0.0085 | 0.0206 | -0.6383 - | | 0.4160 | -0.4154 | 0.679 | 0.937 | 0.11 | -0.0081 | 0.0038 | -1.0396 - | | -0.0379 | -2.1545 | 0.035 | 0.088 | 0.54 |
| Inferior fronto-occipital fasciculus rh | 0.0199 | 0.0104 | -0.0213 - | | 1.0286 | 1.9182 | 0.060 | 0.343 | 0.51 | 0.0082 | 0.0182 | -0.4075 - | | 0.6475 | 0.4483 | 0.656 | 0.937 | 0.12 | -0.0076 | 0.0032 | -1.1306 - | | -0.0977 | -2.3949 | 0.020 | 0.078 | 0.62 |
| Superior fronto-occipital fasciculus rh | -0.0083 | 0.0225 | -0.5714 - | | 0.3914 | -0.3679 | 0.714 | 0.816 | 0.09 | -0.0228 | 0.0420 | -0.5275 - | | 0.2991 | -0.5437 | 0.588 | 0.937 | 0.11 | 0.0037 | 0.0079 | -0.3061 - | | 0.5010 | 0.4749 | 0.636 | 0.792 | 0.10 |
| Uncinate fasciculus rh | -0.0450 | 0.0226 | -1.0139 - | | 0.0031 | -1.9869 | 0.051 | 0.343 | 0.51 | -0.0260 | 0.0393 | -0.6774 - | | 0.3365 | -0.6628 | 0.510 | 0.937 | 0.17 | -0.0021 | 0.0074 | -0.5373 - | | 0.4025 | -0.2822 | 0.779 | 0.799 | 0.07 |
| Fornix (column and body of fornix) | -0.0531 | 0.0553 | -0.6326 - | | 0.2178 | -0.9614 | 0.339 | 0.562 | 0.21 | -0.0602 | 0.0884 | -0.5662 - | | 0.2751 | -0.6809 | 0.498 | 0.937 | 0.15 | -0.0037 | 0.0177 | -0.4136 - | | 0.3342 | -0.2084 | 0.835 | 0.835 | 0.04 |
| Fornix (cres) / Stria terminalis lh | -0.0253 | 0.0187 | -0.7975 - | | 0.1503 | -1.3520 | 0.181 | 0.482 | 0.32 | 0.0017 | 0.0311 | -0.4782 - | | 0.5058 | 0.0552 | 0.956 | 0.996 | 0.01 | 0.0056 | 0.0060 | -0.2361 - | | 0.6550 | 0.9267 | 0.357 | 0.549 | 0.21 |
| Cingulum (hippocampus) lh | 0.0211 | 0.0238 | -0.2699 - | | 0.7127 | 0.8893 | 0.377 | 0.562 | 0.22 | -0.0114 | 0.0391 | -0.5810 - | | 0.4306 | -0.2927 | 0.771 | 0.986 | 0.08 | -0.0047 | 0.0075 | -0.6191 - | | 0.3193 | -0.6292 | 0.531 | 0.708 | 0.15 |
| Cingulum (hippocampus) rh | 0.0266 | 0.0252 | -0.2340 - | | 0.7692 | 1.0545 | 0.296 | 0.561 | 0.27 | -0.0779 | 0.0405 | -1.0361 - | | 0.0205 | -1.9225 | 0.060 | 0.804 | 0.51 | -0.0025 | 0.0078 | -0.5648 - | | 0.4045 | -0.3255 | 0.746 | 0.799 | 0.08 |

*Note*: Longitudinal change AN-TP2–AN-TP1 of blood-based protein markers on FA as assessed through our follow-up LME model (details in the main manuscript). Associations of change scores in NF‑L (log10-transformed), BDNF (log10-transformed and adjusted for batch and storage time effects), and leptin (log10-transformed) with ΔFA were investigated following short-term weight restoration in AN (only those ROIs with significant change AN-TP2–AN-TP1 at FDR-*q*<0.05 according to the main LME model [Figure 1] were analyzed). As model statistics for each predictor of interest (ΔNF‑L, ΔBDNF, and Δleptin), unstandardized coefficient (β), standard error (SE), 95% confidence interval (CI), *t*-value, unadjusted *p*-value, FDR-*q* (FDR-adjustment across all ROIs), and Cohen’s *d* are stated. Significant associations (FDR-*q*<0.05) and associations indicating trends (*p*<0.05) are highlighted in dark gray and gray, respectively.Abbreviations: AN, anorexia nervosa; AN-TP1, participants with acute AN in the acutely underweight state; AN-TP2, participants with AN reassessed after short-term weight restoration; BMI(-SDS), body mass index(-standard deviation score); FA, fractional anisotropy; lh, left hemisphere; rh, right hemisphere; TP, timepoint.

## **Supplementary Table 6: Removing participants with AN on SSRIs/mirtazapine**

| **ROIs showing significant longitudinal FA differences (AN‑TP2–AN‑TP1)** |  | | | | | | | | | | | | | | | | | | | | | | | | | | |
| --- | --- | --- | --- | --- | --- | --- | --- | --- | --- | --- | --- | --- | --- | --- | --- | --- | --- | --- | --- | --- | --- | --- | --- | --- | --- | --- | --- |
| **A** | | | **∆NF‑L** | | | | | | **B** | | | **∆BDNF** | | | | | | **C** | | | **∆leptin** | | | | | |
| **β** | **SE** | **95% CI** | | | ***t*** | ***p*** | ***q*** | ***d*** | **β** | **SE** | **95% CI** | | | ***t*** | ***p*** | ***q*** | ***d*** | **β** | **SE** | **95% CI** | | | ***t*** | ***p*** | ***q*** | ***d*** |
| Cerebral peduncle lh | 0.0007 | 0.0101 | -0.4513 - | | 0.4846 | 0.0700 | 0.944 | 0.969 | 0.02 | 0.0178 | 0.0180 | -0.2306 - | | 0.6916 | 0.9864 | 0.327 | 0.878 | 0.23 | -0.0027 | 0.0031 | -0.6714 - | | 0.2587 | -0.8752 | 0.384 | 0.569 | 0.21 |
| Cerebral peduncle rh | 0.0185 | 0.0123 | -0.1117 - | | 0.8072 | 1.4997 | 0.138 | 0.394 | 0.35 | 0.0243 | 0.0208 | -0.1924 - | | 0.7485 | 1.1682 | 0.247 | 0.878 | 0.28 | 0.0010 | 0.0037 | -0.3927 - | | 0.5167 | 0.2682 | 0.789 | 0.877 | 0.06 |
| Superior cerebellar peduncle lh | 0.0137 | 0.0179 | -0.2740 - | | 0.6203 | 0.7628 | 0.448 | 0.618 | 0.17 | 0.0464 | 0.0303 | -0.0994 - | | 0.7841 | 1.5348 | 0.129 | 0.783 | 0.34 | -0.0102 | 0.0054 | -0.8676 - | | 0.0253 | -1.8750 | 0.064 | 0.152 | 0.42 |
| Superior cerebellar peduncle rh | 0.0090 | 0.0176 | -0.3199 - | | 0.5462 | 0.5140 | 0.609 | 0.722 | 0.11 | 0.0105 | 0.0301 | -0.3535 - | | 0.5067 | 0.3504 | 0.727 | 0.878 | 0.08 | -0.0123 | 0.0052 | -0.9982 - | | -0.0858 | -2.3785 | 0.020 | 0.099 | 0.54 |
| Medial lemniscus lh | 0.0358 | 0.0189 | -0.0249 - | | 0.9743 | 1.8958 | 0.063 | 0.291 | 0.48 | 0.0064 | 0.0335 | -0.4529 - | | 0.5498 | 0.1901 | 0.850 | 0.878 | 0.05 | -0.0140 | 0.0063 | -1.0199 - | | -0.0537 | -2.2246 | 0.029 | 0.101 | 0.54 |
| Medial lemniscus rh | 0.0308 | 0.0184 | -0.0773 - | | 0.9139 | 1.6786 | 0.098 | 0.327 | 0.42 | 0.0373 | 0.0311 | -0.2036 - | | 0.8258 | 1.1967 | 0.236 | 0.878 | 0.31 | -0.0099 | 0.0058 | -0.9040 - | | 0.0678 | -1.7110 | 0.092 | 0.193 | 0.42 |
| Inferior cerebellar peduncle lh | -0.0174 | 0.0174 | -0.7372 - | | 0.2431 | -0.9956 | 0.323 | 0.539 | 0.25 | -0.0325 | 0.0289 | -0.7931 - | | 0.2176 | -1.1265 | 0.264 | 0.878 | 0.29 | -0.0020 | 0.0054 | -0.5650 - | | 0.3884 | -0.3645 | 0.717 | 0.852 | 0.09 |
| Inferior cerebellar peduncle rh | 0.0215 | 0.0178 | -0.1977 - | | 0.8094 | 1.2022 | 0.234 | 0.469 | 0.31 | 0.0188 | 0.0307 | -0.3462 - | | 0.6580 | 0.6121 | 0.543 | 0.878 | 0.16 | -0.0162 | 0.0057 | -1.2105 - | | -0.2058 | -2.8589 | 0.006 | 0.057 | 0.71 |
| Corticospinal tract lh | -0.0237 | 0.0182 | -0.9201 - | | 0.1909 | -1.3034 | 0.198 | 0.469 | 0.37 | -0.0115 | 0.0306 | -0.6767 - | | 0.4594 | -0.3771 | 0.708 | 0.878 | 0.11 | 0.0022 | 0.0057 | -0.4261 - | | 0.6324 | 0.3838 | 0.703 | 0.852 | 0.10 |
| Corticospinal tract rh | 0.0382 | 0.0165 | 0.0821 - | | 1.1996 | 2.3158 | 0.025 | 0.246 | 0.64 | -0.0143 | 0.0291 | -0.7044 - | | 0.4236 | -0.4911 | 0.626 | 0.878 | 0.14 | -0.0090 | 0.0052 | -1.0080 - | | 0.0714 | -1.7317 | 0.089 | 0.193 | 0.47 |
| Genu of corpus callosum | 0.0144 | 0.0100 | -0.1460 - | | 0.9221 | 1.4440 | 0.154 | 0.412 | 0.39 | 0.0245 | 0.0159 | -0.1284 - | | 1.0044 | 1.5414 | 0.130 | 0.783 | 0.44 | -0.0014 | 0.0030 | -0.6558 - | | 0.3954 | -0.4882 | 0.627 | 0.827 | 0.13 |
| Splenium of corpus callosum | 0.0001 | 0.0115 | -0.5172 - | | 0.5239 | 0.0127 | 0.990 | 0.990 | <0.01 | 0.0036 | 0.0200 | -0.4817 - | | 0.5798 | 0.1819 | 0.856 | 0.878 | 0.05 | -0.0011 | 0.0033 | -0.5972 - | | 0.4264 | -0.3285 | 0.744 | 0.852 | 0.09 |
| Anterior corona radiata lh | 0.0065 | 0.0096 | -0.3540 - | | 0.7212 | 0.6740 | 0.503 | 0.649 | 0.18 | 0.0080 | 0.0163 | -0.4206 - | | 0.6983 | 0.4895 | 0.627 | 0.878 | 0.14 | -0.0042 | 0.0029 | -0.9278 - | | 0.1456 | -1.4484 | 0.153 | 0.292 | 0.39 |
| Anterior corona radiata rh | 0.0009 | 0.0096 | -0.5228 - | | 0.5766 | 0.0964 | 0.924 | 0.969 | 0.03 | 0.0221 | 0.0160 | -0.1793 - | | 0.9880 | 1.3791 | 0.175 | 0.873 | 0.41 | -0.0064 | 0.0029 | -1.1684 - | | -0.0579 | -2.2250 | 0.030 | 0.101 | 0.62 |
| Superior corona radiata lh | 0.0086 | 0.0071 | -0.2236 - | | 0.9126 | 1.2034 | 0.235 | 0.469 | 0.35 | -0.0032 | 0.0126 | -0.6613 - | | 0.5095 | -0.2556 | 0.799 | 0.878 | 0.08 | -0.0046 | 0.0021 | -1.1682 - | | -0.0405 | -2.1585 | 0.036 | 0.101 | 0.61 |
| Superior corona radiata rh | 0.0061 | 0.0090 | -0.3643 - | | 0.7443 | 0.6766 | 0.502 | 0.649 | 0.19 | 0.0247 | 0.0148 | -0.0967 - | | 1.0668 | 1.6669 | 0.102 | 0.783 | 0.49 | -0.0025 | 0.0027 | -0.7971 - | | 0.2890 | -0.9249 | 0.359 | 0.553 | 0.26 |
| Posterior corona radiata lh | 0.0123 | 0.0078 | -0.1165 - | | 1.0024 | 1.5786 | 0.121 | 0.371 | 0.45 | 0.0062 | 0.0147 | -0.4474 - | | 0.6932 | 0.4251 | 0.673 | 0.878 | 0.12 | -0.0018 | 0.0025 | -0.7410 - | | 0.3415 | -0.7286 | 0.469 | 0.671 | 0.20 |
| Posterior corona radiata rh | 0.0121 | 0.0097 | -0.2101 - | | 0.9137 | 1.2428 | 0.220 | 0.469 | 0.35 | 0.0162 | 0.0168 | -0.2998 - | | 0.8700 | 0.9654 | 0.339 | 0.878 | 0.29 | -0.0062 | 0.0029 | -1.1559 - | | -0.0338 | -2.1337 | 0.038 | 0.101 | 0.60 |
| Anterior limb of internal capsule lh | 0.0012 | 0.0119 | -0.4504 - | | 0.4986 | 0.0998 | 0.921 | 0.969 | 0.02 | 0.0178 | 0.0203 | -0.2738 - | | 0.7124 | 0.8777 | 0.383 | 0.878 | 0.22 | -0.0085 | 0.0034 | -1.1267 - | | -0.1266 | -2.5254 | 0.014 | 0.099 | 0.63 |
| Anterior limb of internal capsule rh | 0.0060 | 0.0109 | -0.3751 - | | 0.6694 | 0.5555 | 0.581 | 0.722 | 0.15 | 0.0140 | 0.0185 | -0.3329 - | | 0.7459 | 0.7559 | 0.453 | 0.878 | 0.21 | -0.0073 | 0.0032 | -1.1283 - | | -0.0716 | -2.2850 | 0.026 | 0.101 | 0.60 |
| Posterior limb of internal capsule lh | 0.0038 | 0.0074 | -0.3994 - | | 0.6764 | 0.5077 | 0.614 | 0.722 | 0.14 | -0.0184 | 0.0122 | -1.0035 - | | 0.1378 | -1.5119 | 0.137 | 0.783 | 0.44 | -0.0035 | 0.0022 | -0.9654 - | | 0.1077 | -1.5915 | 0.117 | 0.235 | 0.43 |
| Posterior limb of internal capsule rh | 0.0189 | 0.0090 | 0.0224 - | | 1.1181 | 2.0907 | 0.041 | 0.291 | 0.57 | 0.0074 | 0.0168 | -0.4166 - | | 0.6563 | 0.4403 | 0.661 | 0.878 | 0.12 | -0.0091 | 0.0026 | -1.4776 - | | -0.3649 | -3.4278 | 0.001 | 0.041 | 0.93 |
| Retrolenticular part of internal capsule lh | 0.0187 | 0.0092 | 0.0055 - | | 1.1288 | 2.0282 | 0.048 | 0.291 | 0.57 | 0.0062 | 0.0153 | -0.4533 - | | 0.6868 | 0.4039 | 0.688 | 0.878 | 0.12 | -0.0069 | 0.0029 | -1.2074 - | | -0.1074 | -2.4162 | 0.019 | 0.099 | 0.66 |
| Retrolenticular part of internal capsule rh | 0.0272 | 0.0094 | 0.2325 - | | 1.3749 | 2.8802 | 0.006 | 0.077 | 0.81 | 0.0121 | 0.0176 | -0.3680 - | | 0.7621 | 0.6888 | 0.494 | 0.878 | 0.20 | -0.0006 | 0.0033 | -0.5747 - | | 0.4830 | -0.1684 | 0.867 | 0.913 | 0.05 |
| Posterior thalamic radiation lh | 0.0247 | 0.0136 | -0.0497 - | | 1.0355 | 1.8157 | 0.075 | 0.291 | 0.50 | 0.0064 | 0.0236 | -0.4798 - | | 0.6324 | 0.2704 | 0.788 | 0.878 | 0.08 | -0.0091 | 0.0041 | -1.1169 - | | -0.0487 | -2.1933 | 0.032 | 0.101 | 0.59 |
| Posterior thalamic radiation rh | -0.0012 | 0.0106 | -0.5838 - | | 0.5220 | -0.1100 | 0.913 | 0.969 | 0.03 | 0.0345 | 0.0168 | 0.0122 - | | 1.2143 | 2.0576 | 0.046 | 0.607 | 0.62 | -0.0037 | 0.0031 | -0.8752 - | | 0.2183 | -1.1910 | 0.239 | 0.435 | 0.33 |
| Sagittal stratum lh | 0.0368 | 0.0126 | 0.2387 - | | 1.3443 | 2.9269 | 0.005 | 0.077 | 0.79 | 0.0181 | 0.0235 | -0.3298 - | | 0.7516 | 0.7704 | 0.445 | 0.878 | 0.21 | -0.0045 | 0.0045 | -0.7465 - | | 0.2480 | -0.9901 | 0.326 | 0.522 | 0.25 |
| Sagittal stratum rh | 0.0122 | 0.0115 | -0.2440 - | | 0.8149 | 1.0669 | 0.291 | 0.528 | 0.29 | -0.0057 | 0.0186 | -0.6491 - | | 0.4745 | -0.3063 | 0.761 | 0.878 | 0.09 | -0.0012 | 0.0037 | -0.5920 - | | 0.4239 | -0.3259 | 0.746 | 0.852 | 0.08 |
| External capsule lh | -0.0060 | 0.0068 | -0.8036 - | | 0.3086 | -0.8801 | 0.383 | 0.613 | 0.25 | 0.0018 | 0.0130 | -0.5267 - | | 0.6046 | 0.1358 | 0.893 | 0.893 | 0.04 | 0.0001 | 0.0022 | -0.5296 - | | 0.5491 | 0.0357 | 0.972 | 0.972 | <0.01 |
| External capsule rh | 0.0069 | 0.0087 | -0.2988 - | | 0.6984 | 0.7907 | 0.432 | 0.618 | 0.20 | 0.0330 | 0.0157 | 0.0270 - | | 1.0514 | 2.1088 | 0.039 | 0.607 | 0.54 | -0.0077 | 0.0025 | -1.3143 - | | -0.2663 | -3.0815 | 0.003 | 0.041 | 0.79 |
| Superior longitudinal fasciculus lh | 0.0123 | 0.0069 | -0.0596 - | | 1.0543 | 1.7857 | 0.080 | 0.291 | 0.50 | -0.0027 | 0.0126 | -0.6281 - | | 0.5055 | -0.2132 | 0.832 | 0.878 | 0.06 | -0.0048 | 0.0022 | -1.1271 - | | -0.0418 | -2.1652 | 0.035 | 0.101 | 0.59 |
| Superior longitudinal fasciculus rh | 0.0075 | 0.0065 | -0.2356 - | | 0.8799 | 1.1451 | 0.258 | 0.491 | 0.32 | 0.0046 | 0.0120 | -0.4621 - | | 0.6878 | 0.3871 | 0.700 | 0.878 | 0.11 | -0.0066 | 0.0021 | -1.4329 - | | -0.3021 | -3.1595 | 0.003 | 0.041 | 0.87 |
| Inferior fronto-occipital fasciculus lh | 0.0420 | 0.0119 | 0.3801 - | | 1.4722 | 3.5128 | <0.001 | 0.035 | 0.93 | -0.0082 | 0.0214 | -0.6374 - | | 0.4305 | -0.3817 | 0.704 | 0.878 | 0.10 | -0.0081 | 0.0039 | -1.0345 - | | -0.0176 | -2.0707 | 0.043 | 0.106 | 0.53 |
| Inferior fronto-occipital fasciculus rh | 0.0188 | 0.0105 | -0.0541 - | | 1.0091 | 1.7935 | 0.078 | 0.291 | 0.48 | 0.0038 | 0.0187 | -0.4807 - | | 0.5918 | 0.2040 | 0.839 | 0.878 | 0.06 | -0.0079 | 0.0032 | -1.1868 - | | -0.1250 | -2.4961 | 0.015 | 0.099 | 0.66 |
| Superior fronto-occipital fasciculus rh | -0.0082 | 0.0228 | -0.5720 - | | 0.3960 | -0.3579 | 0.722 | 0.825 | 0.09 | -0.0229 | 0.0436 | -0.5238 - | | 0.3027 | -0.5261 | 0.600 | 0.878 | 0.11 | 0.0043 | 0.0081 | -0.2999 - | | 0.5204 | 0.5288 | 0.598 | 0.825 | 0.11 |
| Uncinate fasciculus rh | -0.0417 | 0.0230 | -0.9770 - | | 0.0466 | -1.8128 | 0.075 | 0.291 | 0.47 | -0.0152 | 0.0409 | -0.6074 - | | 0.4144 | -0.3720 | 0.711 | 0.878 | 0.10 | 0.0013 | 0.0075 | -0.4463 - | | 0.5349 | 0.1776 | 0.860 | 0.913 | 0.04 |
| Fornix (column and body of fornix) | -0.0461 | 0.0559 | -0.6056 - | | 0.2479 | -0.8255 | 0.411 | 0.618 | 0.18 | -0.0386 | 0.0915 | -0.5116 - | | 0.3307 | -0.4224 | 0.674 | 0.878 | 0.09 | -0.0009 | 0.0180 | -0.3840 - | | 0.3652 | -0.0494 | 0.961 | 0.972 | <0.01 |
| Fornix (cres) / Stria terminalis lh | -0.0246 | 0.0190 | -0.7848 - | | 0.1643 | -1.2937 | 0.200 | 0.469 | 0.31 | 0.0066 | 0.0324 | -0.4417 - | | 0.5441 | 0.2045 | 0.839 | 0.878 | 0.05 | 0.0061 | 0.0062 | -0.2236 - | | 0.6748 | 0.9907 | 0.325 | 0.522 | 0.23 |
| Cingulum (hippocampus) lh | 0.0188 | 0.0240 | -0.2994 - | | 0.6933 | 0.7828 | 0.437 | 0.618 | 0.20 | -0.0215 | 0.0401 | -0.6537 - | | 0.3742 | -0.5360 | 0.594 | 0.878 | 0.14 | -0.0075 | 0.0074 | -0.7319 - | | 0.2365 | -1.0101 | 0.316 | 0.522 | 0.25 |
| Cingulum (hippocampus) rh | 0.0265 | 0.0257 | -0.2425 - | | 0.7723 | 1.0320 | 0.306 | 0.532 | 0.27 | -0.0858 | 0.0417 | -1.0913 - | | -0.0141 | -2.0586 | 0.044 | 0.607 | 0.56 | -0.0037 | 0.0079 | -0.6133 - | | 0.3773 | -0.4691 | 0.641 | 0.827 | 0.12 |

*Note:* Longitudinal change AN-TP2–AN-TP1 of blood-based protein markers on FA as assessed through our follow-up LME model, excluding patients currently using anti-depressant medication (SSRIs or mirtazapine, n=6). Associations of change scores in NF‑L (log10-transformed), BDNF (log10-transformed and adjusted for batch and storage time effects), and leptin (log10-transformed) with ΔFA were investigated following short-term weight restoration in AN (only those ROIs with significant change AN-TP2–AN-TP1 at FDR-*q*<0.05 according to the main LME model [Figure 1] were analyzed). As model statistics for each predictor of interest (ΔNF‑L, ΔBDNF, and Δleptin), unstandardized coefficient (β), standard error (SE), 95% confidence interval (CI), *t*-value, unadjusted *p*-value, FDR-*q* (FDR-adjustment across all ROIs), and Cohen’s *d* are stated. Significant associations (FDR-*q*<0.05) and associations indicating trends (*p*<0.05) are highlighted in dark gray and gray, respectively.Abbreviations: AN, anorexia nervosa; AN-TP1, participants with acute AN in the acutely underweight state; AN-TP2, participants with AN reassessed after short-term weight restoration; BMI(-SDS), body mass index(-standard deviation score); FA, fractional anisotropy; lh, left hemisphere; rh, right hemisphere; TP, timepoint.

## **Supplementary Table 7: Removing participants with AN with comorbidities**

| **ROIs showing significant longitudinal FA differences (AN TP2–AN TP1)** |  | | | | | | | | | | | | | | | | | | | | | | | | | | |
| --- | --- | --- | --- | --- | --- | --- | --- | --- | --- | --- | --- | --- | --- | --- | --- | --- | --- | --- | --- | --- | --- | --- | --- | --- | --- | --- | --- |
| **A** | | | **∆NF‑L** | | | | | | **B** | | | **∆BDNF** | | | | | | **C** | | | **∆leptin** | | | | | |
| **β** | **SE** | **95% CI** | | | ***t*** | ***p*** | ***q*** | ***d*** | **β** | **SE** | **95% CI** | | | ***t*** | ***p*** | ***q*** | ***d*** | **β** | **SE** | **95% CI** | | | ***t*** | ***p*** | ***q*** | ***d*** |
| Cerebral peduncle lh | 0.0024 | 0.0096 | -0.4347 - | | 0.5597 | 0.2474 | 0.805 | 0.895 | 0.06 | 0.0193 | 0.0185 | -0.2328 - | | 0.7521 | 1.0417 | 0.301 | 0.901 | 0.26 | -0.0037 | 0.0030 | -0.7968 - | | 0.1917 | -1.2115 | 0.230 | 0.384 | 0.30 |
| Cerebral peduncle rh | 0.0207 | 0.0121 | -0.0670 - | | 0.9096 | 1.7161 | 0.091 | 0.332 | 0.42 | 0.0157 | 0.0220 | -0.3155 - | | 0.6749 | 0.7154 | 0.477 | 0.901 | 0.18 | -0.0010 | 0.0038 | -0.5440 - | | 0.4152 | -0.2643 | 0.792 | 0.857 | 0.06 |
| Superior cerebellar peduncle lh | 0.0096 | 0.0181 | -0.3285 - | | 0.5700 | 0.5291 | 0.598 | 0.732 | 0.12 | 0.0295 | 0.0329 | -0.2394 - | | 0.6406 | 0.8987 | 0.372 | 0.901 | 0.20 | -0.0136 | 0.0054 | -1.0559 - | | -0.1153 | -2.5009 | 0.015 | 0.059 | 0.59 |
| Superior cerebellar peduncle rh | 0.0122 | 0.0172 | -0.2871 - | | 0.6101 | 0.7089 | 0.481 | 0.641 | 0.16 | 0.0163 | 0.0316 | -0.3310 - | | 0.5655 | 0.5148 | 0.608 | 0.901 | 0.12 | -0.0138 | 0.0051 | -1.1272 - | | -0.1635 | -2.7020 | 0.009 | 0.049 | 0.65 |
| Medial lemniscus lh | 0.0306 | 0.0195 | -0.1053 - | | 0.8992 | 1.5704 | 0.121 | 0.388 | 0.40 | -0.0280 | 0.0364 | -0.7171 - | | 0.3149 | -0.7689 | 0.445 | 0.901 | 0.20 | -0.0199 | 0.0064 | -1.2897 - | | -0.2646 | -3.0936 | 0.003 | 0.037 | 0.78 |
| Medial lemniscus rh | 0.0321 | 0.0180 | -0.0544 - | | 0.9758 | 1.7833 | 0.080 | 0.332 | 0.46 | 0.0213 | 0.0330 | -0.3589 - | | 0.7068 | 0.6441 | 0.522 | 0.901 | 0.17 | -0.0124 | 0.0058 | -1.0519 - | | -0.0312 | -2.1259 | 0.038 | 0.098 | 0.54 |
| Inferior cerebellar peduncle lh | -0.0179 | 0.0175 | -0.7581 - | | 0.2412 | -1.0220 | 0.311 | 0.582 | 0.26 | -0.0239 | 0.0314 | -0.7111 - | | 0.3153 | -0.7609 | 0.450 | 0.901 | 0.20 | -0.0010 | 0.0056 | -0.5276 - | | 0.4419 | -0.1739 | 0.862 | 0.908 | 0.04 |
| Inferior cerebellar peduncle rh | 0.0206 | 0.0176 | -0.2101 - | | 0.8171 | 1.1699 | 0.247 | 0.493 | 0.30 | 0.0075 | 0.0324 | -0.4519 - | | 0.5719 | 0.2308 | 0.818 | 0.936 | 0.06 | -0.0172 | 0.0057 | -1.2777 - | | -0.2444 | -3.0016 | 0.004 | 0.037 | 0.76 |
| Corticospinal tract lh | -0.0271 | 0.0182 | -1.0018 - | | 0.1447 | -1.4896 | 0.143 | 0.408 | 0.43 | -0.0099 | 0.0330 | -0.6723 - | | 0.4947 | -0.3001 | 0.766 | 0.928 | 0.09 | 0.0036 | 0.0059 | -0.3744 - | | 0.7116 | 0.6126 | 0.543 | 0.740 | 0.17 |
| Corticospinal tract rh | 0.0361 | 0.0166 | 0.0463 - | | 1.1858 | 2.1797 | 0.034 | 0.263 | 0.62 | -0.0341 | 0.0309 | -0.9058 - | | 0.2580 | -1.1040 | 0.275 | 0.901 | 0.33 | -0.0112 | 0.0052 | -1.1530 - | | -0.0376 | -2.1481 | 0.036 | 0.098 | 0.60 |
| Genu of corpus callosum | 0.0138 | 0.0102 | -0.1725 - | | 0.9207 | 1.3595 | 0.180 | 0.474 | 0.38 | 0.0147 | 0.0175 | -0.3314 - | | 0.8209 | 0.8401 | 0.405 | 0.901 | 0.25 | -0.0032 | 0.0030 | -0.8266 - | | 0.2565 | -1.0417 | 0.302 | 0.465 | 0.29 |
| Splenium of corpus callosum | -0.0003 | 0.0116 | -0.5380 - | | 0.5241 | -0.0258 | 0.979 | 0.985 | <0.01 | 0.0037 | 0.0217 | -0.4955 - | | 0.5893 | 0.1703 | 0.865 | 0.936 | 0.05 | -0.0017 | 0.0035 | -0.6547 - | | 0.3898 | -0.4997 | 0.619 | 0.774 | 0.13 |
| Anterior corona radiata lh | 0.0065 | 0.0097 | -0.3625 - | | 0.7362 | 0.6714 | 0.505 | 0.652 | 0.19 | 0.0080 | 0.0177 | -0.4412 - | | 0.7034 | 0.4519 | 0.653 | 0.901 | 0.13 | -0.0046 | 0.0030 | -0.9791 - | | 0.1197 | -1.5579 | 0.125 | 0.228 | 0.43 |
| Anterior corona radiata rh | 0.0012 | 0.0096 | -0.5260 - | | 0.5970 | 0.1246 | 0.901 | 0.974 | 0.04 | 0.0261 | 0.0172 | -0.1443 - | | 1.0542 | 1.5158 | 0.137 | 0.901 | 0.46 | -0.0066 | 0.0029 | -1.2043 - | | -0.0690 | -2.2644 | 0.028 | 0.086 | 0.64 |
| Superior corona radiata lh | 0.0088 | 0.0070 | -0.2139 - | | 0.9509 | 1.2575 | 0.215 | 0.474 | 0.37 | 0.0002 | 0.0133 | -0.5960 - | | 0.6039 | 0.0129 | 0.990 | 0.990 | <0.01 | -0.0046 | 0.0022 | -1.1744 - | | -0.0221 | -2.0909 | 0.042 | 0.098 | 0.60 |
| Superior corona radiata rh | 0.0075 | 0.0083 | -0.3109 - | | 0.8357 | 0.9057 | 0.370 | 0.582 | 0.26 | 0.0166 | 0.0148 | -0.2617 - | | 0.9328 | 1.1153 | 0.271 | 0.901 | 0.34 | -0.0047 | 0.0025 | -1.0981 - | | 0.0395 | -1.8647 | 0.068 | 0.144 | 0.53 |
| Posterior corona radiata lh | 0.0098 | 0.0080 | -0.2167 - | | 0.9213 | 1.2293 | 0.225 | 0.474 | 0.35 | -0.0031 | 0.0157 | -0.6415 - | | 0.5235 | -0.1997 | 0.843 | 0.936 | 0.06 | -0.0035 | 0.0025 | -0.9422 - | | 0.1731 | -1.3706 | 0.177 | 0.307 | 0.39 |
| Posterior corona radiata rh | 0.0120 | 0.0096 | -0.2107 - | | 0.9413 | 1.2600 | 0.214 | 0.474 | 0.37 | 0.0160 | 0.0177 | -0.3249 - | | 0.8729 | 0.9062 | 0.370 | 0.901 | 0.28 | -0.0074 | 0.0029 | -1.3119 - | | -0.1504 | -2.5612 | 0.014 | 0.059 | 0.73 |
| Anterior limb of internal capsule lh | 0.0002 | 0.0115 | -0.4873 - | | 0.4966 | 0.0185 | 0.985 | 0.985 | <0.01 | 0.0220 | 0.0208 | -0.2402 - | | 0.7911 | 1.0564 | 0.295 | 0.901 | 0.28 | -0.0079 | 0.0033 | -1.1211 - | | -0.0927 | -2.3756 | 0.021 | 0.075 | 0.61 |
| Anterior limb of internal capsule rh | 0.0037 | 0.0108 | -0.4406 - | | 0.6237 | 0.3388 | 0.736 | 0.864 | 0.09 | 0.0219 | 0.0196 | -0.2417 - | | 0.8683 | 1.1186 | 0.269 | 0.901 | 0.31 | -0.0067 | 0.0033 | -1.0859 - | | -0.0133 | -2.0553 | 0.045 | 0.099 | 0.55 |
| Posterior limb of internal capsule lh | 0.0037 | 0.0070 | -0.4080 - | | 0.7022 | 0.5226 | 0.604 | 0.732 | 0.15 | -0.0127 | 0.0124 | -0.8904 - | | 0.2829 | -1.0262 | 0.310 | 0.901 | 0.31 | -0.0020 | 0.0022 | -0.8056 - | | 0.2902 | -0.9302 | 0.357 | 0.528 | 0.26 |
| Posterior limb of internal capsule rh | 0.0175 | 0.0088 | -0.0024 - | | 1.1291 | 1.9998 | 0.051 | 0.291 | 0.57 | 0.0148 | 0.0173 | -0.3196 - | | 0.8050 | 0.8533 | 0.398 | 0.901 | 0.24 | -0.0079 | 0.0027 | -1.3827 - | | -0.2507 | -2.9574 | 0.005 | 0.037 | 0.82 |
| Retrolenticular part of internal capsule lh | 0.0166 | 0.0096 | -0.0735 - | | 1.0703 | 1.7431 | 0.088 | 0.332 | 0.50 | -0.0018 | 0.0169 | -0.6154 - | | 0.5516 | -0.1078 | 0.915 | 0.963 | 0.03 | -0.0082 | 0.0030 | -1.3409 - | | -0.2031 | -2.7700 | 0.008 | 0.049 | 0.78 |
| Retrolenticular part of internal capsule rh | 0.0258 | 0.0096 | 0.1831 - | | 1.3498 | 2.6812 | 0.010 | 0.133 | 0.77 | 0.0101 | 0.0191 | -0.4251 - | | 0.7338 | 0.5257 | 0.602 | 0.901 | 0.16 | -0.0010 | 0.0034 | -0.6182 - | | 0.4626 | -0.2836 | 0.778 | 0.857 | 0.08 |
| Posterior thalamic radiation lh | 0.0235 | 0.0137 | -0.0765 - | | 1.0289 | 1.7208 | 0.091 | 0.332 | 0.48 | 0.0133 | 0.0253 | -0.4178 - | | 0.7196 | 0.5235 | 0.603 | 0.901 | 0.15 | -0.0090 | 0.0043 | -1.1143 - | | -0.0268 | -2.1074 | 0.040 | 0.098 | 0.57 |
| Posterior thalamic radiation rh | -0.0004 | 0.0104 | -0.5769 - | | 0.5540 | -0.0398 | 0.968 | 0.985 | 0.01 | 0.0298 | 0.0180 | -0.1068 - | | 1.1160 | 1.6523 | 0.106 | 0.901 | 0.51 | -0.0051 | 0.0032 | -1.0178 - | | 0.1083 | -1.6114 | 0.113 | 0.216 | 0.46 |
| Sagittal stratum lh | 0.0363 | 0.0122 | 0.2581 - | | 1.3864 | 2.9888 | 0.004 | 0.085 | 0.83 | 0.0195 | 0.0245 | -0.3287 - | | 0.7713 | 0.7949 | 0.430 | 0.901 | 0.22 | -0.0051 | 0.0046 | -0.7871 - | | 0.2185 | -1.1185 | 0.268 | 0.428 | 0.29 |
| Sagittal stratum rh | 0.0099 | 0.0117 | -0.3070 - | | 0.7695 | 0.8489 | 0.400 | 0.582 | 0.23 | -0.0111 | 0.0204 | -0.7335 - | | 0.4162 | -0.5447 | 0.589 | 0.901 | 0.16 | -0.0016 | 0.0039 | -0.6279 - | | 0.4055 | -0.4240 | 0.673 | 0.816 | 0.11 |
| External capsule lh | -0.0066 | 0.0068 | -0.8443 - | | 0.2928 | -0.9600 | 0.342 | 0.582 | 0.28 | 0.0044 | 0.0140 | -0.4861 - | | 0.6678 | 0.3106 | 0.758 | 0.928 | 0.09 | 0.0002 | 0.0023 | -0.5301 - | | 0.5709 | 0.0730 | 0.942 | 0.942 | 0.02 |
| External capsule rh | 0.0066 | 0.0087 | -0.3149 - | | 0.7053 | 0.7550 | 0.453 | 0.625 | 0.20 | 0.0289 | 0.0169 | -0.0744 - | | 0.9594 | 1.7055 | 0.093 | 0.901 | 0.44 | -0.0089 | 0.0025 | -1.4947 - | | -0.3986 | -3.5851 | <0.001 | 0.021 | 0.95 |
| Superior longitudinal fasciculus lh | 0.0109 | 0.0070 | -0.1246 - | | 1.0107 | 1.5562 | 0.126 | 0.388 | 0.45 | -0.0054 | 0.0137 | -0.6968 - | | 0.4652 | -0.3932 | 0.696 | 0.921 | 0.12 | -0.0054 | 0.0023 | -1.2018 - | | -0.0875 | -2.3368 | 0.023 | 0.078 | 0.65 |
| Superior longitudinal fasciculus rh | 0.0060 | 0.0068 | -0.3153 - | | 0.8193 | 0.8786 | 0.384 | 0.582 | 0.25 | -0.0003 | 0.0133 | -0.5935 - | | 0.5794 | -0.0238 | 0.981 | 0.990 | <0.01 | -0.0075 | 0.0022 | -1.5585 - | | -0.3902 | -3.4740 | 0.001 | 0.021 | 0.98 |
| Inferior fronto-occipital fasciculus lh | 0.0410 | 0.0117 | 0.3852 - | | 1.5075 | 3.5007 | <0.001 | 0.037 | 0.95 | -0.0039 | 0.0228 | -0.5933 - | | 0.4993 | -0.1693 | 0.866 | 0.936 | 0.05 | -0.0072 | 0.0040 | -0.9859 - | | 0.0497 | -1.8036 | 0.076 | 0.153 | 0.47 |
| Inferior fronto-occipital fasciculus rh | 0.0207 | 0.0097 | 0.0357 - | | 1.1400 | 2.1414 | 0.037 | 0.263 | 0.59 | 0.0121 | 0.0190 | -0.3754 - | | 0.7316 | 0.6351 | 0.528 | 0.901 | 0.18 | -0.0077 | 0.0030 | -1.2274 - | | -0.1336 | -2.5197 | 0.015 | 0.059 | 0.68 |
| Superior fronto-occipital fasciculus rh | -0.0071 | 0.0227 | -0.5731 - | | 0.4162 | -0.3121 | 0.756 | 0.864 | 0.08 | -0.0214 | 0.0467 | -0.5208 - | | 0.3238 | -0.4588 | 0.648 | 0.901 | 0.10 | 0.0049 | 0.0083 | -0.2938 - | | 0.5443 | 0.5882 | 0.558 | 0.740 | 0.13 |
| Uncinate fasciculus rh | -0.0466 | 0.0221 | -1.0982 - | | -0.0272 | -2.1093 | 0.039 | 0.263 | 0.57 | -0.0158 | 0.0428 | -0.6330 - | | 0.4336 | -0.3684 | 0.714 | 0.921 | 0.10 | 0.0009 | 0.0075 | -0.4771 - | | 0.5394 | 0.1206 | 0.904 | 0.928 | 0.03 |
| Fornix (column and body of fornix) | -0.0489 | 0.0558 | -0.6143 - | | 0.2363 | -0.8754 | 0.384 | 0.582 | 0.19 | -0.0717 | 0.0977 | -0.5805 - | | 0.2655 | -0.7331 | 0.466 | 0.901 | 0.16 | -0.0061 | 0.0184 | -0.4390 - | | 0.3116 | -0.3335 | 0.739 | 0.857 | 0.06 |
| Fornix (cres) / Stria terminalis lh | -0.0241 | 0.0189 | -0.7948 - | | 0.1715 | -1.2768 | 0.206 | 0.474 | 0.31 | -0.0303 | 0.0343 | -0.7351 - | | 0.2810 | -0.8824 | 0.381 | 0.901 | 0.23 | 0.0036 | 0.0063 | -0.3229 - | | 0.5830 | 0.5653 | 0.574 | 0.740 | 0.13 |
| Cingulum (hippocampus) lh | 0.0205 | 0.0245 | -0.2916 - | | 0.7186 | 0.8341 | 0.407 | 0.582 | 0.21 | -0.0228 | 0.0444 | -0.6577 - | | 0.3859 | -0.5133 | 0.610 | 0.901 | 0.14 | -0.0070 | 0.0079 | -0.7090 - | | 0.2665 | -0.8952 | 0.374 | 0.534 | 0.22 |
| Cingulum (hippocampus) rh | 0.0255 | 0.0257 | -0.2607 - | | 0.7854 | 0.9916 | 0.326 | 0.582 | 0.26 | -0.0688 | 0.0456 | -0.9633 - | | 0.1328 | -1.5082 | 0.138 | 0.901 | 0.42 | -0.0026 | 0.0082 | -0.5886 - | | 0.4274 | -0.3126 | 0.756 | 0.857 | 0.08 |

*Note:* Longitudinal change AN-TP2–AN-TP1 of blood-based protein markers on FA as assessed through our follow-up LME model, excluding patients with comorbidities (n=20). Associations of change scores in NF‑L (log10-transformed), BDNF (log10-transformed and adjusted for batch and storage time effects), and leptin (log10-transformed) with ΔFA were investigated following short-term weight restoration in AN (only those ROIs with significant change AN-TP2–AN-TP1 at FDR-*q*<0.05 according to the main LME model [Figure 1] were analyzed). As model statistics for each predictor of interest (ΔNF‑L, ΔBDNF, and Δleptin), unstandardized coefficient (β), standard error (SE), 95% confidence interval (CI), *t*-value, unadjusted *p*-value, FDR-*q* (FDR-adjustment across all ROIs), and Cohen’s *d* are stated. Significant associations (FDR-*q*<0.05) and associations indicating trends (*p*<0.05) are highlighted in dark gray and gray, respectively.Abbreviations: AN, anorexia nervosa; AN-TP1, participants with acute AN in the acutely underweight state; AN-TP2, participants with AN reassessed after short-term weight restoration; BMI(-SDS), body mass index(-standard deviation score); FA, fractional anisotropy; lh, left hemisphere; rh, right hemisphere; TP, timepoint.

# **References**

1 Desikan RS, Ségonne F, Fischl B, Quinn BT, Dickerson BC, Blacker D *et al.* An automated labeling system for subdividing the human cerebral cortex on MRI scans into gyral based regions of interest. *NeuroImage* 2006; **31**: 968–980.

2 Von Schwanenflug N, Müller DK, King JA, Ritschel F, Bernardoni F, Mohammadi S *et al.* Dynamic changes in white matter microstructure in anorexia nervosa: findings from a longitudinal study. *Psychol Med* 2019; **49**: 1555–1564.

3 Bahnsen K, Bernardoni F, King JA, Geisler D, Weidner K, Roessner V *et al.* Dynamic Structural Brain Changes in Anorexia Nervosa: A Replication Study, Mega-analysis, and Virtual Histology Approach. *J Am Acad Child Adolesc Psychiatry* 2022; **61**: 1168–1181.

4 Geisler D, King JA, Bahnsen K, Bernardoni F, Doose A, Müller DK *et al.* Altered White Matter Connectivity in Young Acutely Underweight Patients With Anorexia Nervosa. *J Am Acad Child Adolesc Psychiatry* 2022; **61**: 331–340.

5 Hellerhoff I, Bernardoni F, Bahnsen K, King JA, Doose A, Pauligk S *et al.* Serum neurofilament light concentrations are associated with cortical thinning in anorexia nervosa. *Psychol Med* 2023; **53**: 7053–7061.

6 Hellerhoff I, Geisler D, Bernardoni F, Doose A, Tam FI, Poitz DM *et al.* Elevated neurofilament light levels in acute anorexia nervosa are associated with alterations in white matter volume and connectivity networks. *J Child Psychol Psychiatry* 2025; : jcpp.70083.

7 Pfuhl G, King JA, Geisler D, Roschinski B, Ritschel F, Seidel M *et al.* Preserved white matter microstructure in young patients with anorexia nervosa? *Hum Brain Mapp* 2016; **37**: 4069–4083.

8 Petermann F, Petermann U. *HAWIK-IV. Hamburg-Wechsler-Intelligenztest Für Kinder IV*. Huber: Bern, 2007.

9 von Aster M, Neubauer A, Horn R. *WIE. Wechsler Intelligenztest Für Erwachsene*. Pearson Assessment & Information: Frankfurt, Germany, 2008.

10 Petermann, F. *WAIS-IV. Wechsler Adult Intelligence Scale*. Pearson Assessment & Information: Frankfurt, Germany, 2012.

11 Kuhle J, Barro C, Andreasson U, Derfuss T, Lindberg R, Sandelius Å *et al.* Comparison of three analytical platforms for quantification of the neurofilament light chain in blood samples: ELISA, electrochemiluminescence immunoassay and Simoa. *Clin Chem Lab Med CCLM* 2016; **54**: 1655–1661.

12 Wilson DH, Rissin DM, Kan CW, Fournier DR, Piech T, Campbell TG *et al.* The Simoa HD-1 Analyzer: A Novel Fully Automated Digital Immunoassay Analyzer with Single-Molecule Sensitivity and Multiplexing. *SLAS Technol* 2016; **21**: 533–547.

13 Simoa Data Sheet. *Quanterix. Human Neurology 4-Plex ‘A’. NF-light®, Tau, GFAP*, UCHL-1**. 2017.

14 Simoa Data Sheet. *Quanterix. Simoa® NF-lightTM Advantage Kit: HD-1/HD-X Data Sheet*. 2018.

15 Doose A, Hellerhoff I, Tam FI, King JA, Seidel M, Geisler D *et al.* Neural and glial damage markers in women after long-term weight-recovery from anorexia nervosa. *Psychoneuroendocrinology* 2022; **135**: 105576.

16 Hellerhoff I, King JA, Tam FI, Pauligk S, Seidel M, Geisler D *et al.* Differential longitudinal changes of neuronal and glial damage markers in anorexia nervosa after partial weight restoration. *Transl Psychiatry* 2021; **11**.

17 Keeler JL, Bahnsen K, Wronski M-L, Bernardoni F, Tam F, Arold D *et al.* Longitudinal changes in brain-derived neurotrophic factor (BDNF) but not cytokines contribute to hippocampal recovery in anorexia nervosa above increases in body mass index. *Psychol Med* 2024; **54**: 2242–2253.

18 Steinhäuser JL, King JA, Tam FI, Seidel M, Biemann R, Wronski M-L *et al.* Is Serum BDNF Altered in Acute, Short- and Long-Term Recovered Restrictive Type Anorexia Nervosa? *Nutrients* 2021; **13**: 432.

19 Lazar C. imputeLCMD: A collection of methods for left-censored missing data imputation. R package version 2.0. 2015.https://CRAN.R-project.org/package=imputeLCMD.

20 Wei R, Wang J, Jia E, Chen T, Ni Y, Jia W. GSimp: A Gibbs sampler based left-censored missing value imputation approach for metabolomics studies. *PLOS Comput Biol* 2018; **14**: e1005973.

21 Bernardoni F, King JA, Geisler D, Stein E, Jaite C, Nätsch D *et al.* Weight restoration therapy rapidly reverses cortical thinning in anorexia nervosa: A longitudinal study. *NeuroImage* 2016; **130**: 214–222.

22 Cieslak M, Cook PA, He X, Yeh F-C, Dhollander T, Adebimpe A *et al.* QSIPrep: an integrative platform for preprocessing and reconstructing diffusion MRI data. *Nat Methods* 2021; **18**: 775–778.

23 Parker D, Ould Ismail AA, Wolf R, Brem S, Alexander S, Hodges W *et al.* Freewater estimatoR using iNtErpolated iniTialization (FERNET): Characterizing peritumoral edema using clinically feasible diffusion MRI data. *PLOS ONE* 2020; **15**: e0233645.

24 Smith SM, Jenkinson M, Johansen-Berg H, Rueckert D, Nichols TE, Mackay CE *et al.* Tract-based spatial statistics: Voxelwise analysis of multi-subject diffusion data. *NeuroImage* 2006; **31**: 1487–1505.

25 Billah T. pnlbwh/TBSS: Doc enhanced with resource profile and debugging instruction. 2020. doi:10.5281/ZENODO.2662497.

26 Avants B, Tustison NJ, Song G. Advanced Normalization Tools: V1.0. *Insight J* 2009. doi:10.54294/uvnhin.

27 Gorgolewski K, Burns CD, Madison C, Clark D, Halchenko YO, Waskom ML *et al.* Nipype: A Flexible, Lightweight and Extensible Neuroimaging Data Processing Framework in Python. *Front Neuroinformatics* 2011; **5**. doi:10.3389/fninf.2011.00013.

28 Cohen J. Quantitative methods in psychology: A power primer. *Psychol Bull* 1992; : 155–159.

29 Imai K, Keele L, Tingley D. A general approach to causal mediation analysis. *Psychol Methods* 2010; **15**: 309–334.

30 Harris PA, Taylor R, Thielke R, Payne J, Gonzalez N, Conde JG. Research electronic data capture (REDCap)—A metadata-driven methodology and workflow process for providing translational research informatics support. *J Biomed Inform* 2009; **42**: 377–381.

31 R Core Team. *_R: A Language and Environment for Statistical Computing_*. R Foundation for Statistical Computing: Vienna, Austria, 2023<https://www.R-project.org/>.

32 Bates D, Mächler M, Bolker B, Walker S. Fitting Linear Mixed-Effects Models Using**lme4**. *J Stat Softw* 2015; **67**. doi:10.18637/jss.v067.i01.

33 Meteyard L, Davies RAI. Best practice guidance for linear mixed-effects models in psychological science. *J Mem Lang* 2020; **112**: 104092.

34 Tingley D, Yamamoto T, Hirose K, Keele L, Imai K. **mediation**:*R*Package for Causal Mediation Analysis. *J Stat Softw* 2014; **59**. doi:10.18637/jss.v059.i05.

35 Kaufmann L-K, Baur V, Hänggi J, Jäncke L, Piccirelli M, Kollias S *et al.* Fornix Under Water? Ventricular Enlargement Biases Forniceal Diffusion Magnetic Resonance Imaging Indices in Anorexia Nervosa. *Biol Psychiatry Cogn Neurosci Neuroimaging* 2017; **2**: 430–437.

36 Benjamini Y, Hochberg Y. Controlling the False Discovery Rate: A Practical and Powerful Approach to Multiple Testing. *J R Stat Soc Ser B Stat Methodol* 1995; **57**: 289–300.
